1 ***Drosophila* nicotinic acetylcholine receptors and their interactions with**  
2 **insecticidal peptide toxins**

3 Dagmara Korona<sup>1\*</sup>, Benedict Dirnberger<sup>1,2,4\*</sup>, Carlo N G Giachello<sup>4\*</sup>, Rayner M L Queiroz<sup>2</sup>,  
4 David-Paul Minde<sup>2</sup>, Michael J Deery<sup>2</sup>, Glynnis Johnson<sup>1</sup>, Karin H Müller<sup>3</sup>, Lucy C Firth<sup>4</sup>,  
5 Fergus G Earley<sup>4</sup>, Steven Russell<sup>1</sup> \*\* and Kathryn S Lilley<sup>5</sup> \*\*

6

7

8 <sup>1</sup>Department of Genetics, University of Cambridge, Downing Street, Cambridge, CB2 3EH,  
9 United Kingdom

10 <sup>2</sup>Cambridge Centre for Proteomics, Department of Biochemistry, Gleeson Building,  
11 University of Cambridge, Tennis Court Road, Cambridge, CB2 1GA, United Kingdom

12 <sup>3</sup>Cambridge Advanced Imaging Centre, Department of Physiology, Development and  
13 Neuroscience/Anatomy Building, University of Cambridge, Downing Street, CB2 3DY,  
14 United Kingdom

15 <sup>4</sup>Syngenta, Jealott's Hill International Research Centre, Bracknell, RG42 6EY, United  
16 Kingdom

17 <sup>5</sup>Cambridge Centre for Proteomics, Department of Biochemistry, Gleeson Building,  
18 University of Cambridge, Tennis Court Road, Cambridge, CB2 1GA, United Kingdom.  
19 k.s.lilley@bioc.cam.ac.uk

20 \*These authors contributed equally: Dagmara Korona, Benedict Dirnberger, Carlo N G  
21 Giachello

22 \*\*Correspondence should be addressed to Kathryn S Lilley k.s.lilley@bioc.cam.ac.uk and  
23 Steven Russell sr120@cam.ac.uk

24

25

26

27

28 **Abstract**

29 *Drosophila* nicotinic acetylcholine receptors (nAChRs) are ligand-gated ion channels that  
30 represent a target for insecticides. Peptide neurotoxins are known to block nAChRs by binding  
31 to their target subunits, however, a better understanding of receptor subunit composition is  
32 needed for effective design of insecticides. To facilitate the analysis of nAChRs we used a  
33 CRISPR/Cas9 strategy to generate null alleles for all ten *nAChR* subunit genes in a common  
34 genetic background. We studied interactions of nAChR subunits with peptide neurotoxins by  
35 larval injections and styrene maleic acid lipid particles (SMALPs) pull-down assays. For the  
36 null alleles we determined the effects of  $\alpha$ -Bungarotoxin ( $\alpha$ -Btx) and  $\omega$ -Hexatoxin-Hv1a  
37 (Hv1a) administration, identifying potential receptor subunits implicated in the binding of these  
38 toxins. We employed pull-down assays to confirm  $\alpha$ -Btx interactions with the *D $\alpha$ 5*, *D $\alpha$ 6*, *D $\alpha$ 7*  
39 subunits. Finally, we report the localization of fluorescent tagged endogenous *D $\alpha$ 6* during  
40 nervous system development. Taken together this study elucidates native *Drosophila* nAChR  
41 subunit interactions with insecticidal peptide toxins and provides a resource for the *in vivo*  
42 analysis of insect nAChRs.

43

44 **Keywords** *Drosophila* nAChRs / insecticidal toxins / nAChR null alleles / SMALPs pull-  
45 downs

46 **Subject Categories** Neurotransmitter receptor/ Neurotoxin interactions

47

48

49

50

51

52

53

54

## 55 Introduction

56 Global climate change and other factors are placing increasing demands on available  
57 agricultural land to deliver efficient, reliable and sustainable food production. Insecticides are  
58 important tools in securing yields of all major crops but need to be continually replaced to  
59 overcome resistance in target species and reduce environmental impacts. In addition, new  
60 insecticides must have low toxicity to non-target species, particularly the major pollinators  
61 essential for agriculture. A large class of insecticide targets are neurotransmitter receptors such  
62 as the nicotinic acetylcholine receptors (nAChRs) located in synaptic plasma membranes (Ihara  
63 *et al*, 2020). These pentameric cys-loop ligand-gated ion channels consist of either only  $\alpha$ -  
64 subunits or  $\alpha$ - and  $\beta$ -subunits, with ligand binding sites located between two  $\alpha$ -subunits or  
65 between  $\alpha$ - and  $\beta$ -subunits. Most insect genomes, including that of the highly tractable  
66 *Drosophila melanogaster* model, harbour ten highly conserved subunit genes that assemble in  
67 various combinations to form the active receptors.

68 An essential pre-requisite for effective design of new insecticides targeting these receptors is  
69 understanding the subunit composition of nAChRs and their distinctive binding properties. For  
70 many reasons, including low expression in endogenous tissues or difficulties in expressing  
71 insect receptors in heterologous systems, the characterisation of functional insect receptors has  
72 been challenging (Perry *et al*, 2021; Zuo *et al*, 2021; Salgado, 2021). Even in the tractable *D.*  
73 *melanogaster* insect model, there has been no systematic isolation of mutations in *nAChR*  
74 subunit genes, until recently, when Perry and colleagues described the generation of a new set  
75 of null mutations in nine out of the ten *D. melanogaster* subunit genes (Perry *et al*, 2021). These  
76 mutations, however, were generated in different genetic backgrounds necessitating additional  
77 work to assay background sensitive phenotypes such as neural or behavioural defects.

78 Several classes of insecticide, the most effective being those in the neonicotinoid and spinosad  
79 class, have been shown to bind insect nAChRs highly selectively to block their functions  
80 (Chambers *et al*, 2019; Houchat *et al*, 2019). Recently, the binding affinity and the positive  
81 allosteric effects of  $\omega$ -Hexatoxin-Hv1a (Hv1a) peptide on nAChRs has been demonstrated  
82 (Chambers *et al*, 2019) and this spider venom peptide is well known for its insecticidal effects.  
83 In addition, other peptide toxins, such the snake venom constituent,  $\alpha$ -Bungarotoxin ( $\alpha$ -Btx),  
84 have been widely used to probe nAChR functions, however whether  $\alpha$ -Btx harbours a selective  
85 insecticidal property is currently unknown. Alpha-Btx is a 74 amino acid peptide that binds  
86 irreversibly to nAChR  $\alpha$ -subunits in different species, including *D. melanogaster*, although the

87 exact subunit composition of target receptors is not fully understood (Schmidt-Nielsen *et al*,  
88 1977; Dellisanti *et al*, 2007; Dacosta *et al*, 2015). Landsdell and co-workers have shown  
89 binding of  $\alpha$ -Btx to *D. melanogaster* D $\alpha$ 5, D $\alpha$ 6, and D $\alpha$ 7 subunits in a heterologous S2 cell  
90 expression system (Lansdell & Millar, 2004; Lansdell *et al*, 2012) and the amino acid sequence  
91 of these subunits show strong similarity across their ligand-binding domains (LBD).

92 The lipid bilayer surrounding nAChRs is known to be essential for structural integrity, stability  
93 and ligand binding (Dacosta *et al*, 2013). However, this lipid requirement can make analysis  
94 of membrane protein complexes challenging. The development of methods for extracting  
95 membrane proteins from lipid bilayers using detergents and introducing them into artificial  
96 lipid nanodiscs has facilitated a much better characterisation of receptor-ligand interactions  
97 (Denisov & Sligar, 2016). The use of detergents generally used to solubilize membrane  
98 proteins, however, leads to destabilisation, aggregation and misfolding and are therefore not  
99 compatible with this type of analysis (Loo *et al*, 1996). Styrene maleic acid lipid particles  
100 (SMALPs) allow detergent-free extraction of membrane proteins in their local lipid  
101 environment and provide a promising technique for investigating receptor-ligand interactions  
102 under native conditions (Lee *et al*, 2016). This is particularly important since loss of lipids  
103 surrounding membrane proteins can lead to changes in measured binding affinities (Martens *et al*  
104 *al*, 2018; Gault *et al*, 2020). The combination of detergent free SMALPs extraction coupled  
105 with mass spectrometry analysis provides a potential route for characterising native membrane  
106 receptor complexes (Sobotzki *et al*, 2018; Kalxdorf *et al*, 2021).

107 Here we report the results from a combined genetic and biochemical analysis of *D.*  
108 *melanogaster* nAChRs *in vivo*. Using CRISPR/Cas9 genome engineering we generated new  
109 null mutations for all ten receptor subunit genes in a uniform genetic background as well as  
110 introducing a fluorescent protein tag into the *nAChRa6* locus. We show that the null mutants  
111 in all seven  $\alpha$ -subunit genes and two of the three  $\beta$ -subunit genes are viable and fertile, although  
112 we find mild morphological defects and some neurological impairment. Mutation of the  
113 remaining subunit gene, *nAChR $\beta$ 1*, is recessive lethal. All nine of the viable null mutants were  
114 used to demonstrate a novel selective insecticidal effect of  $\alpha$ -Btx on the *nAChRa5*, *nAChRa6*  
115 and *nAChRa7* subunits. We also applied the insecticidal Hv1a peptide to the viable null  
116 mutants, showing resistance with two subunit gene mutants: *nAChRa4* and *nAChR $\beta$ 2*. In our  
117 biochemical studies we analysed receptor-ligand interactions in native conditions using  
118 SMALPs to verify the *in vivo* receptor subunit composition of the  $\alpha$ -Btx binding target in adult  
119 neural tissue from wild-type and receptor subunit mutants. Our analysis revealed binding of  $\alpha$ -

120 Btx to receptors containing D $\alpha$ 5, D $\alpha$ 6 and D $\alpha$ 7 subunits with the analysis of mutants in these  
121 subunits genes indicating heterogeneity in  $\alpha$ -Btx binding nAChRs. Furthermore, we have  
122 identified specific glycosylation sites in D $\alpha$ 5 and D $\alpha$ 7 subunits which are known from other  
123 studies to play a critical role in  $\alpha$ -Btx binding affinity (Dellisanti *et al*, 2007; Rahman *et al*,  
124 2020). Localization studies with the D $\alpha$ 6 subunit tagged at the endogenous locus with a  
125 fluorescent reporter shows expression at different developmental stages in specific neuronal  
126 cells, including the Kenyon cells of the mushroom bodies, a known site of  $\alpha$ -Btx-binding.

127

## 128 **Results**

### 129 **New *D. melanogaster* nicotinic acetylcholine receptor subunit gene mutations**

130 To investigate the role of individual nAChR subunits we used CRISPR/Cas9 to generate  
131 deletion mutations in each of the seven  $\alpha$ -subunit and three  $\beta$ -subunit genes. All of the  
132 mutations were generated in virtually identical genetic backgrounds using nanos-Cas9 sources  
133 on the second or third chromosome of otherwise genetically homogeneous fly lines. In brief,  
134 for each gene we targeted exons shared between all predicted isoforms, close to the N-terminus  
135 of the protein. In order to disrupt each coding sequence and facilitate screening we introduced  
136 a visible fluorescent marker, DsRED under control of the eye-specific 3xP3 promoter at the  
137 targeted locus. Positive lines were confirmed by PCR and sequencing, and subsequently the  
138 DsRED marker was excised from the genome by Cre-Lox recombination.

139 For nine out of ten subunit genes we established homozygous viable and fertile stocks, the  
140 exception was the *nAChR $\beta$ 1* gene which proved to be recessive lethal. Although all the other  
141 lines are viable, we noticed that most of the mutants, but particularly *nAChR $\alpha$ 1*, *nAChR $\alpha$ 2*,  
142 *nAChR $\alpha$ 5* and *nAChR $\beta$ 3*, exhibited a curled abdomen phenotype that is most prominent in  
143 males (approximately 25, 20, 15 and 15 % respectively, Fig 1A). It is possible that this  
144 phenotype is a result of defects in neural control of abdominal muscles and it is interesting to  
145 note that a previous analysis of an *nAChR $\alpha$ 1* allele reports reduced male courtship and mating  
146 (Somers *et al*, 2017).

147 Since nAChRs are mostly found in the nervous system, we carried out basic climbing assays  
148 on the null alleles to assess potential locomotor defects (Fig 1B, Appendix Table S1). We saw  
149 little or no impact on the locomotor activity of ten day old flies with *nAChR $\alpha$ 4*, *nAChR $\alpha$ 5*,  
150 *nAChR $\alpha$ 7*, *nAChR $\beta$ 2* or *nAChR $\beta$ 3* homozygous mutants, however, deletions of *nAChR $\alpha$ 1*,

151 *nAChRa2* and *nAChRa6* showed 50-60 % reductions in climbing ability compared to wild-  
152 type. In addition, the *nAChRa3* null mutant and heterozygotes for *nAChRβ1* exhibited a severe  
153 reduction in locomotor activity to less than 40 % of wild-type (22% and 34% respectively).

154 Taken together, we report the generation and validation of null mutations in all ten *D.*  
155 *melanogaster* *nAChR* subunit genes, with mild morphological defects associated with most of  
156 the new alleles and impaired locomotion observed with some mutants.

### 157 **Distinct nAChR subunits mediate interactions with ω-Hexatoxin-Hv1a and α-** 158 **Bungarotoxin**

159 In order to investigate the selective contribution of each *nAChR* subunits to toxin binding *in*  
160 *vivo*, we injected 3<sup>rd</sup> instar larvae from the homozygous *nAChR* null mutants with either ω-  
161 Hexatoxin-Hv1a (Hv1a) or α-Bungarotoxin (α-Btx) dissolved in PBS. As a control, injections  
162 of PBS alone (vehicle) were performed in parallel, and all larvae survived the injection  
163 procedure and showed no detectable defects. Larval injection of 2.5 nmol/g Hv1a induced  
164 locomotor paralysis and full lethality in the control groups (*w<sup>1118</sup>*, *THattP40* and *THattP2*, Fig  
165 2A, Appendix Table S2). Survival was quantified as the percentage of pupae formed after  
166 injection. Hv1a did not result in full lethality with *nAChRa4* and *nAChRβ2* homozygous  
167 mutants, since both showed an increase in survival to 42±22% (One-way ANOVA followed  
168 by Bonferroni's test,  $P=0.0035$ , Fig 2A). Mortality in all the other null mutants was comparable  
169 to controls ( $P>0.9$ ).

170 We also observed significant toxicity following injection of 1.25 nmol/g α-Btx, with larvae  
171 exhibiting a progressive reduction in locomotion until stationary, resulting in developmental  
172 arrest and death. We found that α-Btx induced lethality is drastically reduced in the *nAChRa5*,  
173 *nAChRa6* and *nAChRa7* subunit mutants, with the survival rate significantly increased from  
174 0% (controls) to 61±10% ( $P=0.001$ ), 53±24% ( $P=0.0051$ ) and 72±25% ( $P=0.0001$ )  
175 respectively (One-way ANOVA followed by Bonferroni's test, Fig 2B).

176 Together, these results indicate that Hv1a and α-Btx do not share the same binding target and  
177 differentially interact with the *nAChR* subunits *in vivo*. Since α-Btx showed a novel insecticidal  
178 effect on *nAChRs* we further examined its interactions biochemically.

179

180

## 181 **Forming SMA-lipid particles (SMALPs) of ring-like nAChR complex structures**

182 In order to take advantage of our new receptor subunit mutants for the biochemical analysis of  
183 native nAChR functions, we examined the composition of the receptors responsible for binding  
184  $\alpha$ -Btx. To address the functionality of *D. melanogaster* nAChRs isolated from endogenous  
185 membranes, we utilised detergent-free SMALPs extraction to characterise the interaction  
186 between receptor native lipid discs and the  $\alpha$ -Btx toxin (Fig 3A).

187 In brief, we prepared membrane extracts from adult *D. melanogaster* heads (Depner *et al*, 2014)  
188 and generated lipid particle discs by solubilising the membrane extracts with the SMA  
189 copolymer. We used affinity beads coupled to  $\alpha$ -Btx (Wang *et al*, 2003; Mulcahy *et al*, 2018)  
190 to enrich for nAChRs in the SMALP preparations that bound to the toxin, and performed mass  
191 spectrometric analysis of tryptic peptides generated from the enriched preparations. In parallel  
192 we processed membrane extracts without SMALP and with SMALP extracts enriched with  
193 beads alone.

194 We first determined whether membrane protein discs are formed from enriched membranes  
195 using the SMA copolymer. We prepared membrane enriched fractions from adult heads,  
196 solubilized these with SMA and separated the insoluble particles from the lipid discs by  
197 ultracentrifugation. We negatively stained the SMALP preparations and imaged them with  
198 transmission electron microscopy (TEM), observing irregular discs of varying shapes and  
199 sizes, with clusters containing different numbers of discs (Fig 3B).

200 Membrane receptors often have a unique shape in TEM images and the five subunits of a  
201 nAChRs is expected to form a ring-like structure, suggesting that the receptors are extracted as  
202 a complex. However, we did not observe pentameric ring-like structures perhaps suggesting  
203 that nAChRs are of low abundance and that analysis may benefit from enrichment. We coupled  
204  $\alpha$ -Btx to affinity beads to enrich nAChR complexes that bind the toxin in SMALP preparations  
205 (Fig 3C). In contrast to the unenriched samples, TEM images of the enriched preparations  
206 showed increased numbers of ring-like structures of 15 nm in diameter (Fig 3D and E). Thus  
207 our TEM analysis shows an increased number of ring-like membrane complexes in the SMALP  
208 preparations which are likely to be nAChRs.

209

210

211

## 212 **Efficient SMALPs extraction allow to study nAChR subunits solubility**

213 To assess to what extent the SMA copolymer solubilized nAChRs, we performed a bottom-up  
214 proteomics analysis to identify receptor subunits. Membrane preparations were solubilized in  
215 buffer with or without SMA, and affinity beads with or without  $\alpha$ -Btx were used to assess  
216 ligand-binding to nAChR subunits. Comparing the number of proteins identified in samples  
217 solubilized either with or without 5% SMA, we observed a significantly increased  
218 identification rate of proteins dissolved in SMA by equal numbers of MS/MS spectral counts  
219 (two-tailed t-test,  $P < 0.01$ , Fig 4A and non-significant, Fig 4B). This indicates that mass  
220 spectrometer performance was comparable during the measurements.

221 Sequences of membrane spanning segments of nAChR subunits, which are in close contact to  
222 the hydrophobic lipid environment, are largely composed of nonpolar side chains. Determining  
223 the average of hydrophobicity of identified protein sequences revealed significantly increased  
224 numbers of proteins with a positive hydrophobicity score in samples solubilized in SMA (two-  
225 tailed t-test,  $P < 0.0001$ , Fig 4C), indicative of enrichment of membrane proteins. An analysis  
226 of Gene Ontology (GO) slim terms supports the conclusion that the SMALP preparations are  
227 enriched of membrane embedded and associated proteins (Fig 4D), and that these are not  
228 limited to plasma membrane proteins. In the SMA-enriched samples we found enrichment for  
229 proteins annotated with metabolic and catalytic activity terms and also enhanced response to  
230 biological stimuli (Appendix Fig S1A and B), highlighting the recovery of membrane-  
231 associated proteins.

232 Next, we focused on identified membrane proteins predicted to contain transmembrane helical  
233 (TMH) domains and found an increased number of proteins containing TMHs in SMA  
234 solubilized samples (Fig 4E). While the majority of these proteins contained a single TMH  
235 domain, we identified Piezo, a mechanosensory ion channel protein containing 37 predicted  
236 transmembrane helices. Both  $\alpha$ - and  $\beta$ -nAChR subunits contain four TMH domains and could  
237 be solubilized in SMA. The number of  $\beta$ -barrel membrane spanning proteins identified was  
238 also significantly increased by SMA extraction (two-tailed t-test,  $P < 0.0001$ , Appendix Fig  
239 S1C).

240 In addition, palmitoylated lipid anchor modifications to nAChR subunits has been shown to be  
241 important for receptor assembly into membranes and the formation of functional complexes  
242 (Alexander *et al*, 2010). Comparing samples solubilized with and without SMA showed a  
243 significantly increased identification of proteins which are predicted to be palmitoylated and



244 myristoylated (two-tailed t-test,  $P < 0.0001$ , Appendix Fig S1D and E). In contrast, membrane  
245 proteins that are predicted to contain a glycosylphosphatidylinositol (GPI)-anchor are equally  
246 solubilized in both conditions (two-tailed t-test, non-significant, Appendix Fig 1F).

247 Focusing on the membrane receptors solubilized by SMA, we analysed the amino acid  
248 sequence properties of identified proteins and calculated an overall solubility score (Sormanni  
249 *et al*, 2015; Sormanni *et al*, 2017). Comparing the solubility to the hydrophobicity showed a  
250 calculated  $R^2$  of 0.56 (Fig 4F). Sequences with a score greater than 1 are highly soluble  
251 receptors and those less than minus -1 are difficult to solubilize. As a result, samples solubilized  
252 in SMA contain more receptors, which are difficult to solubilize. These receptors are more  
253 hydrophobic and contain larger numbers of TMH domains (Fig 4G). Calculating an average  
254 solubility score of -2.76 for nAChR sequences indicates that difficult to solubilize subunits are  
255 successfully recovered with SMA (Fig 4H).

256 Taken together, these analyses confirm that SMA solubilizes nAChR complexes in a state  
257 suitable for subunit identification by mass spectrometry and suggests that  $\alpha$ -Btx interactions  
258 can be studied with SMALP preparations.

### 259 **Three nAChR $\alpha$ -subunits are targets of $\alpha$ -Btx**

260 To explore native nAChR subunit interactions with  $\alpha$ -Btx we searched for peptides from  
261 subunit ligand-binding and cytoplasmic domains, identifying the  $D\alpha 5$ ,  $D\alpha 6$  and  $D\alpha 7$  subunits  
262 in the  $\alpha$ -Btx affinity bead pull-downs (Fig 5A and B, Appendix Table S3). Several other  
263 nAChR subunit peptides could be identified in the negative controls performed without  
264 coupling  $\alpha$ -Btx to affinity beads (Appendix Table S4). The sequences of the ligand-binding  
265 domains of the  $D\alpha 5$ ,  $D\alpha 6$  and  $D\alpha 7$  subunits are very similar (avg. 95.49 %) and we identified  
266 peptides common to all three subunits (Appendix Fig S2A) as well as unique peptides within  
267 their cytoplasmic domains (Appendix Fig S2B). However, we found no evidence of peptides  
268 mapping to TMH domains. The ligand-binding domain of  $\alpha$ -subunits show structural similarity  
269 across different species (Appendix Fig S3A) and by mapping the identified peptides to known  
270 structures we concluded they are most likely outside of the  $\alpha$ -Btx binding sites (Appendix Fig  
271 S3B).

272 To further characterize the role of the three  $\alpha$ -subunits identified in  $\alpha$ -Btx binding we generated  
273 SMALP preparations and performed  $\alpha$ -Btx affinity bead enrichments with adult head  
274 preparations from homozygous null mutations for each of the *nAChR $\alpha 5$* , *nAChR $\alpha 6$*  and

275 *nAChR $\alpha$ 7* subunit genes. With all three deletion mutants we observed, as expected, no  
276 detectable peptides from the missing subunit but could still identify peptides from the other  
277 two subunits (Fig 5C).

278 We compared the repertoire of proteins identified with  $\alpha$ -Btx enrichment in wild-type with  
279 those found in each of the three mutant lines to identify any changes in the representation of  
280 biological pathways annotated in KEGG (Kanehisa *et al*, 2020, Fig 5D). While the enrichments  
281 in wild-type and the mutants were broadly similar, we noticed a loss of proteins associated with  
282 cofactor/vitamin metabolism, particularly retinol and ascorbate, in all three of the mutants as  
283 well as proteins associated with vesicular transport. It is possible that these pathway changes  
284 represent alterations in neurotransmitter production or trafficking. Interestingly, we also  
285 noticed specific enrichment of cytochrome P450 related pathways in the *nAChR $\alpha$ 6* mutants,  
286 suggesting perturbation of neurotransmitter pathways.

287 In summary, our analysis indicates that a functional  $\alpha$ -Btx binding nAChR involves the D $\alpha$ 5,  
288 D $\alpha$ 6 and D $\alpha$ 7 subunits. This is entirely in line with our genetic findings described above, where  
289 loss of each of these subunit genes conferred substantial resistance to  $\alpha$ -Btx induced lethality.

### 290 **Glycosylation sites of nAChR subunits by $\alpha$ -Btx binding**

291 We next examined glycosylation sites on nAChR subunits since these are known to have an  
292 important role in  $\alpha$ -Btx binding affinity in other systems. For example, deglycosylation reduces  
293  $\alpha$ -Btx binding in human nAChRs by more than two orders of magnitude (Dellisanti *et al*, 2007)  
294 and  $\alpha$ -Btx binding to loop C in *Torpedo californica*  $\alpha$ -subunits is enhanced by N-glycosylation  
295 of sites in these regions (Rahman *et al*, 2020). To identify specific glycosylation sites in *D.*  
296 *melanogaster* nAChRs we first purified SMALP solubilized receptors with  $\alpha$ -Btx affinity  
297 beads, digested them into peptides and enriched for glycopeptides using HILIC resin  
298 (Hägglund *et al*, 2004, Fig 6A).

299 Site-specific identification of glycans on peptides by mass spectrometry is challenging (Fang  
300 *et al*, 2020) and often requires an additional deglycosylation step for glycopeptide  
301 measurement. Deglycosylation of enriched peptides was carried out using two separate  
302 enzymes: Endoglycosidase H (Endo H), which cleaves asparagine-linked oligosaccharides to  
303 generate a truncated sugar molecule with one N-acetylhexosamine (HexNAc) residue, and the  
304 endoglycosidase PNGase F, which releases the entire glycan from asparagine residues and  
305 deaminates the sugar free asparagine to aspartic acid. While very few glycopeptides were

306 observed in the flow through (an average 20 glycopeptides Fig 6B), we identified a total of 397  
307 glycopeptides after enrichment and deglycosylation with Endo H or PNGase F (Fig 6C).

308 Shared glycopeptides from D $\alpha$ 5 and D $\alpha$ 7 nAChR subunits were identified after enrichment  
309 and deglycosylation with Endo H or PNGase F (Fig 6D). Deglycosylation with Endo H  
310 identified modified asparagine (N2) residues on the peptide (NNGSCLYVPPGIFK), which is  
311 predicted to be part of the D $\alpha$ 5 and D $\alpha$ 7 ligand-binding domains involved in  $\alpha$ -Btx binding.  
312 This asparagine residue was modified with an N-acetylhexosamine (HexNAc) truncated sugar  
313 chain. Releasing N-glycans after deglycosylation by PNGase F enabled us to identify a  
314 deaminated asparagine residue in the same peptide. The monoisotopic mass of this peptide  
315 changed due to the different modifications on the asparagine residue (Fig 6E).

316 The genome of *Caenorhabditis elegans* encodes for at least 29 nAChR subunits (Jones *et al*,  
317 2007). The alpha-type unc-63 subunit contains an N-linked HexNAc modified asparagine  
318 residue on position 136 (Kaji *et al*, 2007). Performing a multiple sequence alignment showed  
319 that this asparagine residue is conserved between insects and nematodes (Appendix Fig S4A).  
320 Comparing identified glycosylation sites of D $\alpha$ 5 and D $\alpha$ 7 subunits to known N-linked  
321 glycosylation sites of  $\alpha$ -subunits from *T. californica*, *Danio rerio*, *Mus musculus* or *Homo*  
322 *sapiens* indicates that this site is not conserved between vertebrates and invertebrates  
323 (Appendix Fig S4B).

324 We also identified glycosylation sites in the D $\alpha$ 3 (ATKATLNYTGR) and D $\beta$ 3  
325 (VVLPENGTAR) subunits after Endo H treatment but not with PNGase F treatment,  
326 suggesting they harbour a single N-linked HexNAc modified asparagine residue (Appendix  
327 Fig S4C).

328 Taken together these findings suggest that the D $\alpha$ 5 and D $\alpha$ 7 subunits are modified at  
329 asparagine residues in the  $\alpha$ -Btx ligand-binding domain with an N-linked sugar chain.

### 330 **Localization of D $\alpha$ 6 nAChRs subunit in the brain**

331 In order to examine the endogenous localization of an  $\alpha$ -Btx binding receptor subunit we used  
332 CRISPR/Cas9 genome engineering to introduce in frame C-terminal fluorescence and epitope  
333 tags into the endogenous *nAChR $\alpha$ 6* locus. The resulting line is homozygous viable and fertile,  
334 and shows no apparent phenotypes. We live imaged the unfixed brains of larvae and adults  
335 homozygous for the tagged line using confocal microscopy. In 2<sup>nd</sup> instar larvae we observed

336 low level well-distributed fluorescence signal throughout the ventral nerve cord (VNC),  
337 including on commissural axons, and in the developing brain (Fig 7A).

338 By early L3, we found more defined localization in the VNC and developing mushroom bodies  
339 (Fig 7B and D), particularly noticeable in the Kenyon cells, a known site of  $\alpha$ -Btx binding (Su  
340 & O'Dowd, 2003). Localization in larval mushroom bodies continued to evolve, with defined  
341 expression in the Kenyon cells, calyx, peduncle, dorsal and medial lobes as well as the medulla  
342 and lamina of the emerging optic lobes (Fig 7C and E). We also observed localisation to a  
343 number of cell bodies overlying the optic lobes (Fig 7F).

344 Finally, in the adult brain, expression was largely restricted to the mushroom bodies  
345 particularly the Kenyon cells and connections across the midline between the  $\beta$  and  $\gamma$  lobes and  
346 the optic lobes (Fig 7G). The temporal localization of Da6 subunit in the CNS is summarized  
347 in schematic form (Fig 7H).

## 348 **Discussion**

349 Elucidation of complex insect nAChRs heterogeneity will lead to a better understanding of  
350 selective insecticidal effects. We present a new set of null mutations in all *D. melanogaster*  
351 *nAChR* subunit genes and investigated insecticidal peptide toxin effects on wild-type and  
352 receptor subunit mutant larvae. Utilising biochemical approaches with SMALP pull-downs we  
353 characterised toxin binding and subunit composition of native nAChR complexes.

354

355 Our genome engineering approach generated viable and fertile mutations in nine out of the ten  
356 subunit genes encoded in the *D. melanogaster* genome and is largely concordant with the  
357 recently described work by Perry and colleagues (Perry *et al*, 2021). In both studies, null  
358 mutations in the *nAChR $\beta$ 1* gene were inviable as stocks. We add to the previous work by  
359 generating viable mutations in *nAChR $\alpha$ 5*. We observed some minor morphological defects in  
360 some of the null mutants especially in *nAChR $\alpha$ 1*, *nAChR $\alpha$ 2*, *nAChR $\alpha$ 5* and *nAChR $\beta$ 3* as well  
361 as locomotor defects with some alleles, particularly severely in *nAChR $\alpha$ 3* homozygotes and  
362 *nAChR $\beta$ 1* heterozygotes. The locomotor defects we observed are in agreement with previously  
363 reported neuronal phenotypes with *nAChR* subunit genes, including sleep disruption, defective  
364 jump response, memory impairment or locomotor defects (Fayyazuddin *et al*, 2006; Rohde *et*  
365 *al*, 2016; Somers *et al*, 2017; Tackenberg *et al*, 2020).

366 We used the nAChR null mutants to study insecticidal effects of the Hv1a peptide on viability  
367 after injection into larvae and investigated whether  $\alpha$ -Btx has any insecticidal properties. As  
368 described by Chambers and colleagues, we confirm that Hv1a effects nAChRs (Chambers *et*  
369 *al*, 2019) and our analysis shows that the D $\alpha$ 4 and D $\beta$ 2 subunits are involved in the insecticidal  
370 response. We show for the first time that  $\alpha$ -Btx has selective insecticidal effects against the  
371 D $\alpha$ 5, D $\alpha$ 6 and D $\alpha$ 7 subunits, which we further characterized at the biochemical level.

372 The pharmacology of Hv1a and  $\alpha$ -Btx binding has been shown to be distinctive (Chambers *et*  
373 *al*, 2019), correlating with our demonstration that these two peptide toxins mediate their effects  
374 through different receptor alpha subunits. Furthermore, resistance to neonicotinoid  
375 insecticides, which interact most strongly with Hv1a binding, has been associated with D $\beta$ 2  
376 (Perry *et al*, 2008; Perry *et al*, 2021), consistent with the involvement of this subunit in the  
377 response to Hv1a. However, no resistance to neonicotinoids was seen in *D. melanogaster*  
378 carrying a *nAChRa4* gene deletion (Perry *et al*, 2021), which could be explained if  
379 neonicotinoids act at multiple receptor classes. Multiple binding sites for the neonicotinoid  
380 imidacloprid can be resolved in equilibrium binding assays in many insect species (Xu *et al*,  
381 2010) and by binding kinetics in flies (Liu & Casida, 1993).

382 Resistance to spinosad is strongly associated with D $\alpha$ 6 (Perry *et al*, 2021), and spinosad binding  
383 is much more sensitive to the action of  $\alpha$ -Btx than to the action of neonicotinoids (Chambers  
384 *et al*, 2019), again consistent with the involvement of this subunit with sensitivity to injected  
385  $\alpha$ -Btx and with the proposition that  $\alpha$ -Btx and Hv1a act at distinct receptor classes.

386 nAChR subunits are known to be difficult to purify due to solubilisation issues (Cheng *et al*,  
387 2015; Maldonado-Hernández *et al*, 2020) and the requirement for a lipid environment for  
388 ligand binding (Dacosta *et al*, 2013) makes it challenging to study these receptors in native  
389 conditions. We used the SMALPs extraction method for preparing membrane discs and  
390 enriched nAChRs via  $\alpha$ -Btx affinity purification. Electron microscopy analysis indicated that  
391 receptor-like particles were recovered and these were substantially enriched by  $\alpha$ -Btx pull-  
392 down. Mass spectrometry analysis showed an enrichment for the D $\alpha$ 5, D $\alpha$ 6 and D $\alpha$ 7 subunits  
393 in these preparations, which is concordant with our *in vivo* injection results and previous studies  
394 that characterised aspects of  $\alpha$ -Btx binding (Lansdell & Millar, 2004; Wu *et al*, 2005; Lansdell  
395 *et al*, 2012).

396 To our knowledge this is the first report of the identification of a native endogenous  $\alpha$ -Btx  
397 binding nAChRs. We note however, that we cannot determine from our analysis whether all

398 three identified subunits are part of the same complex or if there are different receptors  
399 containing a subset of these subunits. Using chimeric receptors in a cell line system, Landsdell  
400 and colleagues reported that a combination of all three of these subunits show high affinity  
401 acetylcholine binding but  $\alpha$ -Btx binding varied depending on receptor combinations, with D $\alpha$ 5  
402 and D $\alpha$ 6 binding most strongly (Landsdell *et al*, 2012). In a prior study they implicated D $\alpha$ 6 and  
403 D $\alpha$ 7 (Landsdell & Millar, 2004). However, these assays were performed with 5HT3A-nAChR  
404 subunit fusions, here we provide strong evidence that these three subunits bind to  $\alpha$ -Btx *in vitro*  
405 and *in vivo*.

406 In addition, glycopeptide enrichment showed site specific glycosylation modifications on the  
407 D $\alpha$ 5 and D $\alpha$ 7 nAChR subunit ligand binding domains. The unique lipid environment and  
408 glycosylation sites of nAChR  $\alpha$ -subunits from the electric ray, *T. californica*, were found to be  
409 important for  $\alpha$ -Btx binding activities (Quesada *et al*, 2016; Rahman *et al*, 2020), and structural  
410 studies support this conclusion (Dellisanti *et al*, 2007). Our work supports the view that there  
411 is a role for D $\alpha$ 5 and D $\alpha$ 7 glycosylation modifications in the recognition of  $\alpha$ -Btx in *D.*  
412 *melanogaster*.

413 Our localization studies with fluorescence tagged endogenous D $\alpha$ 6 subunit showed relatively  
414 restricted expression in the brain and ventral nerve cord, with prominent expression in the  
415 Kenyon cells of the mushroom body, all known regions. The expression of D $\alpha$ 6 in Kenyon  
416 cells across development is in line with a proposed role for this subunit in memory plasticity,  
417 along with other  $\alpha$ -subunits including D $\alpha$ 5, in mushroom body output neurons (Barnstedt *et al*,  
418 2016). Thus, it is possible that retention of  $\alpha$ -Btx binding in the absence of D $\alpha$ 6 may simply  
419 reflect its restricted localisation. In contrast, it is clear that D $\alpha$ 6 plays a major and specific role  
420 in binding to the insecticide spinosad in *D. melanogaster* since mutations in this subunit are  
421 highly resistant to the toxin (Perry *et al*, 2015).

422 Localization studies of D $\alpha$ 6 nAChRs subunit fusion protein by confocal microscopy are largely  
423 consistent with recent reports of *nAChRa6* expression derived from expression reporters  
424 (Kondo *et al*, 2020), though these studies appear to indicate wider adult brain expression than  
425 we observed, perhaps reflecting a degree of translational control or limitations in the sensitivity  
426 of our live imaging.

427 In conclusion, we identified ligand-binding subunit sites for a *D. melanogaster* nAChR  
428 antagonist with newly insecticidal effects. Our findings contribute to a better understanding of  
429 the role of nAChR subunits which interacts with insecticidal peptide toxins.

## 430 **Materials and methods**

### 431 **Drosophila methods**

432 Embryos were injected using standard procedures into the *THattP40* ( $y^1 sc v^1 sev^{21}; P\{y^{+7.7}$   
433  $v^{+1.8} nos-Cas9.R\}attP40$ ) or *THattP2* ( $y^1 sc v^1 sev^{21}; P\{y^{+7.7} v^{+1.8} nos-Cas9.R\}attP2$ ) lines  
434 expressing *nos-Cas9* (Bloomington *Drosophila* Stock Centre). Donor DNA (500 ng/μL) in  
435 sterile H<sub>2</sub>O was injected together with of gRNA plasmids (100 ng/μL) as described previously  
436 (Korona *et al*, 2020). Individually selected surviving adults were crossed to *w<sup>1118</sup>* and the  
437 progeny screened for DsRED fluorescence localized mostly to the eyes of transgenic flies:  
438 positive flies were balanced and homozygous stocks established where possible. The correct  
439 localization of the insert was confirmed via PCR and sequencing. Transgenic flies were  
440 assessed for the phenotype using bright field microscope. For tagging of *nAChRa6*, the stocks  
441 were additionally subjected to Cre-recombination for marker removal and several independent  
442 lines were verified by PCR. Some of these lines were screened for YFP fluorescence using  
443 confocal microscopy. From the YFP positive balanced stocks, the viable and fertile  
444 homozygote was established. Injections were performed by the Department of Genetics Fly  
445 Facility (<https://www.flyfacility.gen.cam.ac.uk>). All fly stocks were maintained at 25°C on  
446 standard cornmeal medium. Larvae of 2<sup>nd</sup> and 3<sup>rd</sup> stage were collected, and their brains were  
447 dissected according to standard protocols. Brains were mounted in glycerol and live imaged.

### 448 **Cloning of gRNAs and generation of donor vectors**

#### 449 **Construction of *nAChR* subunits null alleles**

450 In order to generate individual *nAChR* subunits gene deletions the open reading frame (ORF)  
451 was disrupted by introducing a visible marker harbouring DsRED marker under eye specific  
452 driver 3Px3 using CRISPR/Cas9 technology as previously described (Korona *et al*, 2020). The  
453 targeted exons are shared between different isoforms and adjacent to the N-terminus to ensure  
454 the protein translated was interrupted. The insertion sites were designed *in silico* and optimal  
455 gRNAs were chosen (Appendix Table S5) that were tested against the injection strain and  
456 cloned into pCDF3. Briefly, target specific sequences were synthesized and either 5'-

457 phosphorylated annealed and ligated into the *Bbs*I sites of pCDF3 pre-cut with *Bbs*I. Positive  
458 clones were confirmed by sequencing.

459 For generation of donor vectors, firstly, homology arms were amplified on genomic DNA  
460 (Appendix Table S6) that, secondly, were used as a template to amplify the homology arms  
461 (Appendix Table S7) of the donor vector for CRISPR/Cas9 homologous recombination (HDR).  
462 The inserts with visible marker were amplified using as a template previously generated  
463 constructs (Korona *et al*, 2020) with appropriate primers. These fragments were used for  
464 Gibson assembly using Gibson Assembly Master Mix (New England Biolabs). PCR products  
465 were produced with the Q5 High-Fidelity 2X Master Mix (New England Biolabs). All inserts  
466 were verified by sequencing.

#### 467 **C-terminal tagging of $\alpha 6$ nAChRs subunit fusion protein**

468 For tagging of  $\alpha 6$  nAChRs subunit the C-terminal fusion with FSVS fluorescent protein  
469 harbouring StrepII and 3xFLAG epitope tags (3xFLAG-StrepII-Venus-StrepII) was generated  
470 for CRISPR/Cas9 mediated genome engineering (Korona *et al*, 2017; Korona *et al*, 2020).  
471 Firstly, gRNAs were designed (Appendix Table S5) and tested against the genomic DNA  
472 sequence of injection strains. The oligonucleotides were phosphorylated and ligated into *Bbs*I  
473 pre-cut pCDF3. The positive variants were confirmed by sequencing.

474 The donor vector to generate protein fusion with fluorescent protein harbouring epitope tags  
475 was cloned in 2 steps strategy by creating initially (A) nAChR $\alpha 6$ -FSVS donor and then adding  
476 the removable marker to generate (B) nAChR $\alpha 6$ -FSVS-loxP-3PX3\_DsRED\_loxP donor  
477 vector. At first, the homology arms were enriched on genomic DNA (Appendix Table S6) and  
478 used to amplify homology arms for donor vector nAChR $\alpha 6$ -FSVS (Appendix Table S7) that  
479 was assembled using Gibson Assembly as described above. The FSVS tag was amplified on  
480 previously generated constructs (Korona *et al*, 2017) with appropriate overlapping  
481 oligonucleotides (Appendix Table S7). The construct was confirmed by Sanger sequencing and  
482 used as a template to generate donor vector with removable marker. The PCR fragments  
483 harbouring homology arms and FSVS tag were amplified on nAChR $\alpha 6$ -FSVS construct,  
484 whereas the 3PX3-DsRed with adjacent loxP sites was amplified using earlier generated  
485 constructs (Korona *et al*, 2017). The final donor vector was generated using Gibson  
486 Assembly® as described above and positive variants were confirmed by sequencing.

487



## 488 **Confocal microscopy**

489 Localization of FSVS-tagged (3xFLAG-StrepII-Venus-StrepII) D $\alpha$ 6 nAChRs subunit was  
490 visualised in dissected larvae brains via monitoring the YFP fluorescence (Venus). Briefly, the  
491 larval brains were dissected and mounted in glycerol for live imaging. Images were acquired  
492 using a Leica SP8 confocal microscope (Leica microsystems) with appropriate spectral  
493 windows for mVenus, images were processed with Fiji software.

## 494 **Locomotor behaviour**

495 Adult female and male flies were collected shortly after eclosion and separated into 10 cohorts  
496 consisting of 10 flies (100 total) for each genotype. Flies were maintained at 25°C and  
497 transferred to fresh food every three days. For the climbing assay, each cohort was transferred  
498 to 10ml serological pipette, and allowed to acclimatize for five min. For each trial, flies were  
499 tapped down to the bottom of the vial, and the percentage of flies able to cross a five-ml mark  
500 successfully within 10 seconds was recorded as the climbing index. Five trials were performed  
501 for each cohort, with a 1-min recovery period between each trial. Climbing assays were  
502 performed 10 days after eclosion.

## 503 **Drosophila larval injections**

504 Injections were performed by using the Nanoliter 2000 (World Precision Instruments,  
505 Hertfordshire, United Kingdom) mounted on a micromanipulator (Narishige, London, United  
506 Kingdom). Micropipettes were pulled from glass capillary tubes (1.14 mm OD, 0.530 mm  $\pm$   
507 25  $\mu$ m ID; #4878, WPI) using a laser-based micropipette puller (Sutter P-2000, Sutter  
508 Instrument, Novato, CA, USA). Third instar larvae (wandering stage) were transferred to an  
509 adhesive surface after being quickly washed with water to remove food residues and gently  
510 dried using paper tissue. The micropipette was positioned over the approximate centre of the  
511 body, on the dorsal side, and the tip was advanced through the cuticle into the hemocoel of the  
512 larva. Larvae were injected with 69 nL of PBS (phosphate-buffered saline) supplemented with  
513 10% (v/v) filtered food dye (PME, moss green food colouring; 0.2  $\mu$ m filter). Food dye was  
514 included to aid in monitoring the success of the injection under a dissection microscope (Leica  
515 MZ65, Milton Keynes, United Kingdom).  $\omega$ -hexatoxin-Hv1a (Hv1a, Syngenta,  
516 Schaffhauserstrasse, CH-4332 Stein, Switzerland) and  $\alpha$ -Bungarotoxin ( $\alpha$ -Btx, ab120542,  
517 Abcam, Cambridge, United Kingdom) were added to the injection mix in order to obtain a final  
518 concentration of 2.5 nmol/g and 1.25 nmol/g, respectively (average larval weight was 2.14 mg).

519 After injection, larvae were then gently transferred into agar/grape juice (Ritchie Products  
520 Limited, Burton-On-Trent, United Kingdom) plates and kept at 25°C. The rate of survival  
521 (expressed as percentage) was calculated as the number of living pupae, formed 1-2 days after  
522 injection, divided by the total number of injected larvae. Experiments were repeated three times  
523 independently with a total number of 10 larvae for each experimental group. Results were  
524 analysed with One-way ANOVA followed by Bonferroni's multiple comparisons test using  
525 GraphPad Prism (version 7, GraphPad Software, San Diego, California, USA).

### 526 **Coupling procedure of $\alpha$ -Bungarotoxin to affinity beads**

527 Coupling of  $\alpha$ -Bungarotoxin,  $\alpha$ -Btx (ab120542, Abcam, Cambridge, United Kingdom) to  
528 cyanogen bromide-activated (CNBr) sepharose beads 4B (C9 142-5G, Sigma-Aldrich,  
529 Haverhill, United Kingdom) was performed as described (Wang *et al*, 2003; Mulcahy *et al*,  
530 2018). CNBr-activated sepharose 4B beads (0.25 g) were hydrated in 1.25 ml of 1 mM HCl for  
531 1 hr at 4°C on a rotator. Beads were centrifuged for 5 min at 1500  $\times$  g, the supernatant removed  
532 and beads washed twice with 1 ml of coupling buffer (0.25 M NaHCO<sub>3</sub>, 0.5 M NaCl, pH 8.3).  
533 Beads were centrifuged for 5 min at 1500  $\times$  g and the supernatant was removed. Alpha-Btx (1  
534 mg) was resuspended in 1 ml coupling buffer and incubated together with the affinity beads at  
535 4°C for 16 hr on a rotator. Beads were centrifuged for 5 min at 1500  $\times$  g. Coupling efficiency  
536 was determined using a Pierce<sup>TM</sup> quantitative fluorometric peptide kit and used according to  
537 the manufacturer's instructions (23290, Thermo Scientific<sup>TM</sup>, Bishop's Stortford, United  
538 Kingdom). Beads were blocked with 1 ml of 0.2 M glycine in 80 % coupling buffer at 4°C for  
539 16 hr on a rotator. Beads were then centrifuged for 5 min at 1500  $\times$  g and washed with 1 ml of  
540 0.1 M NaHCO<sub>3</sub>, 0.5 M NaCl, pH 8.0. This step was repeated with 1 ml of 0.1 M NaCH<sub>3</sub>CO<sub>2</sub>,  
541 0.5 M NaCl, pH 4.0. Beads were washed again in 1 ml of 0.1 M NaHCO<sub>3</sub>, 0.5 M NaCl, pH 8.0.  
542 After a final wash step with 1 ml coupling buffer the beads were incubated twice for 30 min in  
543 1 ml Tris-buffer (50 mM Tris, 150 mM NaCl, pH 8.0). The beads were centrifuged for 5 min  
544 at 1500  $\times$  g, the supernatant was removed and 20  $\mu$ l Tris-buffer, pH 8.0 was added.

### 545 **Membrane protein enrichment and incorporation in SMALPs**

546 *D. melanogaster* heads were obtained and separated according to (Depner *et al*, 2014). In a 50  
547 ml falcon tube approximately 6 g flies were rapidly frozen in liquid nitrogen and vortexed twice  
548 for 3 min, with the tube cooled for 30 sec in liquid nitrogen between. Heads were separated  
549 from bodies by sieving (1201124 & 1201125, Endecotts, London, United Kingdom). 1 ml of

550 isotonic lysis buffer (0.25 M sucrose, 50 mM TRIS/HCl pH 7.4, 10 mM HEPES pH 7.4, 2mM  
551 EDTA, Protease inhibitor) was added to approximately 0.8 g separated heads. The solution was  
552 mixed three times by vortexing and the heads were lysed with 60 strokes in a Dounce  
553 homogenizer with a pestle. Membrane protein preparation was performed by differential  
554 centrifugation-based fractionation as described (Depner *et al*, 2014; Geladaki *et al*, 2019).  
555 Membrane protein pellets were resuspended in 20 to 100  $\mu$ l 5 % SMALP solution (5 % styrene  
556 maleic acid copolymer (3:1), 5 mM Tris-Base, 0.15 mM NaCl, pH 8.0). For efficient  
557 incorporation and formation of SMALPs, membrane proteins were incubated with 5 % SMALP  
558 solution for 2 hr at room temperature on a rocking platform. To separate the insoluble proteins  
559 from the soluble SMALPs a centrifugation step at  $100000 \times g$  for 60 min,  $4^{\circ}\text{C}$  was performed.  
560 Supernatant containing the SMALPs was combined and used for the nAChRs pull-downs.

### 561 **Enrichment of nAChRs by $\alpha$ -Btx pull-down**

562 SMALPs (20-35 mg/ml) were incubated with 200  $\mu$ l  $\alpha$ -Btx conjugated affinity beads for 16 hr,  
563  $4^{\circ}\text{C}$  on a rotator. The beads were then centrifuged for 5 min at  $1500 \times g$  and washed two or  
564 three times, each for 10 min with 1 ml ice-cold TBS (50 mM Tris, 150 mM NaCl, pH 8.0) on  
565 a rotator at  $4^{\circ}\text{C}$ . Beads were centrifuged for 5 min at  $1500 \times g$  and nAChRs selectively eluted  
566 twice with 100  $\mu$ l 1 M carbachol (CAS 51-83-2, Insight Biotechnology Ltd, Wembley, United  
567 Kingdom). These steps were performed for 25 min at room temperature on a rotator. Beads  
568 were centrifuged for 5 min at  $1500 \times g$  and eluates were combined and ice-cold 100 % acetone  
569 in the volume of four times of the sample was added to the samples, mixed by vortexing and  
570 proteins were precipitated for 16 hr at  $-20^{\circ}\text{C}$ . Samples were centrifuged at  $13000 \times g$  for 15  
571 min. Supernatant was removed and dried proteins were dissolved in Laemmli buffer (1M Tris  
572 pH 6.8, 10 % SDS, 5 % glycerol, 2 % bromophenol blue). Proteins were heated at  $60^{\circ}\text{C}$  and  
573 loaded on Mini-Protean TGX precast gels (456–1084, 4-15 %, Bio-Rad Laboratories, Inc.,  
574 Watford, United Kingdom).

### 575 **Electron microscopy preparation**

576 For negative staining analysis, membrane proteins were extracted with 5 % SMA and nAChRs  
577 were enriched using  $\alpha$ -Btx affinity pull-downs. Proteins were diluted 1:10 with deionised water  
578 to approximately 0.9 mg/ml and an aliquot of the samples were absorbed onto a glow-  
579 discharged copper/carbon-film grid (EM Resolutions) for approximately 2 min at room  
580 temperature. Grids were rinsed twice in deionised water and negative staining was performed  
581 using a 2 % aqueous uranyl acetate solution. Samples were viewed in a Tecnai G2 transmission

582 electron microscope (TEM, FEI/ThermoFisher) run at 200 keV accelerating voltage using a 20  
583  $\mu\text{m}$  objective aperture to increase contrast; images were captured using an AMT CCD camera.

#### 584 **Sample preparation for liquid chromatography–mass spectrometry (LC-MS)**

585 The protein lanes were excised from the gels and proteolytic digestion with trypsin/lys-C mix  
586 (V5073, Promega, Southampton, United Kingdom) was performed as described (Shevchenko  
587 *et al*, 2007). The gel pieces were covered with 50 mM  $\text{NH}_4\text{HCO}_3$  / 50 % ACN and shaken for  
588 10 min. This step was repeated with 100 % acetonitrile and finally dried in a speed vac. Samples  
589 were reduced with 10 mM DTT in 50 mM  $\text{NH}_4\text{HCO}_3$  at 56°C for 1 hr and alkylated with 50  
590 mM iodoacetamide in 50mM  $\text{NH}_4\text{HCO}_3$  at room temperature without light for 45 min. The gels  
591 were covered with 50 mM  $\text{NH}_4\text{HCO}_3$  and 100 % ACN and shaken for 10 min. These steps were  
592 repeated and samples were dried in a speed vac. Trypsin/lys-C buffer was added to the sample  
593 according to manufacturer’s instructions and incubated for 45 min on ice. Next 30  $\mu\text{l}$  25 mM  
594  $\text{NH}_4\text{HCO}_3$  was added and samples were incubated at 37°C for 16 hr. The gel pieces were  
595 covered with 20 mM  $\text{NH}_4\text{HCO}_3$  and shaken for 10 min. Supernatant with peptides was  
596 collected. Next, the gels were covered with 50 % ACN / 5 % FA and shaken for 20 min. These  
597 steps were repeated and peptides were dried in a speed vac. Samples for glycopeptide  
598 enrichment were digested in-solution according to (Queiroz *et al*, 2019). Samples were reduced  
599 and alkylated in 10 mM DTT and 50 mM iodoacetamide. Proteins were digested in final  
600 concentration of 2.5  $\mu\text{g}$  trypsin/lys-C buffer for 16 hr at 37°C.

#### 601 **Peptide clean-up**

602 Peptides were desalted using C-18 stage tips according to (Rappsilber *et al*, 2007). C-18  
603 material (three C-18 plugs were pasted in a 200  $\mu\text{l}$  pipette tip, Pierce™ C18 Spin Tips, 84850  
604 Thermo Scientific™, Bishop's Stortford, United Kingdom) was equilibrated with methanol/0.1  
605 % FA , 70 % ACN/0.1 % FA and with 0.1 % FA. Peptides were loaded on C-18 material,  
606 washed with 0.1 % FA and eluted with 70 % ACN/0.1 % FA. Samples were dried and finally,  
607 peptides were resuspended in 20  $\mu\text{l}$  0.1 % FA. For glycopeptide enrichment peptides were first  
608 desalted using poros oligo r3 resin (1-339-09, Thermo Scientific™, Bishop's Stortford, United  
609 Kingdom) as described (Gobom *et al*, 1999; Queiroz *et al*, 2019). Pierce™ centrifuge columns  
610 (SH253723, Thermo Scientific™, Bishop's Stortford, United Kingdom) were filed with 250  $\mu\text{l}$   
611 of poros oligo r3 resin. Columns were washed three times with 0.1 % TFA. Peptides were

612 loaded onto the columns and washed three times with 0.1 % TFA and subsequently eluted with  
613 70 % ACN.

#### 614 **Glycopeptide enrichment**

615 Enrichment of glycopeptides of nAChRs was performed as described (Hägglund *et al*, 2004).  
616 Micro columns were prepared with 200 µl peptide tips filled with a C8 plug and iHILIC –  
617 fusion 5µm, 100 Å silica based material (HCS 160119, Hilicon, Umeå, Sweden). Peptides were  
618 solubilized stepwise in 19 µl dH<sub>2</sub>O and then in 80 µl ACN plus 1 µl TFA acid. The micro  
619 columns were cleaned with 50 µl 0.1 % TFA and three times equilibrated with 100 µl 80 %  
620 ACN, 1 % TFA. Peptides were loaded onto the micro column and washed twice with 100 µl  
621 80 % ACN, 1 % TFA. Glycopeptides were eluted from the column using twice 40 µl 0.1 %  
622 TFA and finally with 20 µl 80 % ACN, 1 % TFA. Samples were dried in a speed vac before  
623 peptides were deglycosylated with Endo H or PNGase F according to manufacturer's  
624 instructions (P07025 & P0710S, New England Biolabs Inc., Hitchin, United Kingdom).

#### 625 **LC-MS/MS**

626 Peptide samples were dissolved in 20 µl of 0.1 % (v/v) FA. Approximately 1 µg peptide  
627 solution was used for each LC-MS/MS analysis. All LC-MS/MS experiments were performed  
628 using a Dionex Ultimate 3000 RSLC nanoUPLC (Thermo Fisher Scientific Inc, Waltham, MA,  
629 USA) system and a Q Exactive<sup>TM</sup> Orbitrap mass spectrometer (Thermo Fisher Scientific Inc,  
630 Waltham, MA, USA). Separation of peptides was performed by reverse-phase chromatography  
631 at a flow rate of 300 nL/min and a Thermo Scientific reverse-phase nano Easy-spray column  
632 (Thermo Scientific PepMap C18, 2µm particle size, 100A pore size, 75 µm i.d. x 50 cm length).  
633 Peptides were loaded onto a pre-column (Thermo Scientific PepMap 100 C18, 5µm particle  
634 size, 100A pore size, 300 µm i.d. x 5mm length) from the Ultimate 3000 autosampler with 0.1  
635 % FA for 3 min at a flow rate of 15 µL/min. After this period, the column valve was switched  
636 to allow elution of peptides from the pre-column onto the analytical column. Solvent A was  
637 water + 0.1 % FA and solvent B was 80 % ACN, 20 % water + 0.1 % FA. The linear gradient  
638 employed was 2-40 % B in 90 min (the total run time including column washing and re-  
639 equilibration was 120 min). In between runs columns were washed at least four times to avoid  
640 any carryovers. The LC eluant was sprayed into the mass spectrometer by means of an Easy-  
641 spray source (Thermo Fisher Scientific Inc.). An electrospray voltage of 2.1 kV was applied in  
642 order to ionize the eluant. All *m/z* values of eluting ions were measured in an Orbitrap mass

643 analyzer, set at a resolution of 35000 and scanned between  $m/z$  380-1500 Data dependent scans  
644 (Top 20) were employed to automatically isolate and generate fragment ions by higher energy  
645 collisional dissociation (HCD, Normalised collision energy (NCE): 25 %) in the HCD collision  
646 cell and measurement of the resulting fragment ions were performed in the Orbitrap analyser,  
647 set at a resolution of 17500. Singly charged ions and ions with unassigned charge states were  
648 excluded from being selected for MS/MS and a dynamic exclusion of 20 seconds was  
649 employed.

## 650 **Peptide/protein database searching**

651 Protein identification was carried out using sequest HT or mascot search engine software  
652 operating in Proteome Discoverer 2.3 (Eng *et al*, 1994; Koenig *et al*, 2008). Raw files were  
653 searched against the uniprot *Drosophila\_melanogaster\_20180813* database (23297 sequences;  
654 16110808 residues) and a common contaminant sequences database. The search parameters  
655 using mascot algorithm were: (i) trypsin was set as the enzyme of choice, (ii) precursor ion  
656 mass tolerance 20 ppm, (iii) fragment ion mass tolerance 0.1 Da, (iv) maximum of two missed  
657 cleavage sites were set, (v) a minimum peptide length of six amino acids were set, (vi) fixed  
658 cysteine static modification by carbamidomethylation, (vii) variable modification by  
659 methionine oxidation & deamidation on asparagine and glutamine and N-acetylhexosamine  
660 (HexNAc(1)dHex(1) + HexNAc on asparagine) as variable glycopeptide modifications, (viii)  
661 A site probability threshold of 75 % was set, (ix) Percolator was used to assess the false  
662 discovery rate and peptide filters were set to high confidence (FDR<1).

## 663 **Data handling and statistical analysis**

664 Protein data evaluation was performed using R 3.5.3 (Ihaka & Gentleman, 1996). Plotting of  
665 graphs were performed in RStudio 1.3.959 (Rstudio, 2020) using ggplot2 (Ginestet, 2011) and  
666 other R packages. In order to characterise membrane proteins the following tools were used:  
667 (i) TMHMM - 2.0 (Krogh *et al*, 2001), (ii) PRED-TMBB2 (Tsirigos *et al*, 2016) (iii) SwissPalm  
668 (Blanc *et al*, 2015), (iv) PredGPI (Pierleoni *et al*, 2008), (v) Gravy calculator ([www.gravy-calculator.de](http://www.gravy-calculator.de)), (vi) Myristoylator (Bologna *et al*, 2004) (vii) Solubility scores (Sormanni *et al*,  
670 2015; Sormanni *et al*, 2017). Analysis of gene ontology (GO) slim terms (Carbon *et al*, 2019)  
671 were performed within proteome discoverer 2.3 (Thermo Fisher Scientific). KEGG (Kanehisa  
672 *et al*, 2020) pathway enrichment analysis was performed using DAVID (Huang *et al*, 2009).  
673 For each experimental investigation  $n \geq 3$  were considered and data are represented as means  
674  $\pm$  SEM. Experiments were performed in a blinded manner whenever possible. Data are

675 presented as mean  $\pm$  SD. Statistical tests for SMALPs were performed using two-tailed t-test  
676 with an unequal variance and  $P$  values of  $\leq 0.05$  were considered to be significant. In DAVID,  
677 Fisher's exact  $P$  values are computed to measure the gene-enrichment terms. Fisher's exact  $P$   
678 value of 0 represents perfect enrichment of a term. Usually  $P$  value of  $\leq 0.05$  are to be  
679 considered as strongly enriched. In this study the default threshold set in DAVID of 0.1 was  
680 used. Linear regression analysis was performed in order to study the efficiency of SMALPs  
681 extraction of membrane receptors.

## 682 **Structural assessment and illustration of nAChR subunits**

683 For structural alignment of nAChRs matchmaker command operating in UCSF Chimera X 0.91  
684 (Goddard *et al*, 2018) was used. This command is superimposing protein structures by first  
685 creating pairwise sequence alignments, then fitting the aligned residue pairs and displays in an  
686 overlaid structure as a result. The following parameters were set to create the aligned structure:  
687 (i) alignment algorithm; Needleman-Wunsch (ii) similarity matrix; BLOSUM-62. Structural  
688 animation was performed in Blender 2.8 ([www.blender.org](http://www.blender.org)), an open-source 3D graphics  
689 software. For annotation of protein sequences InterProScan was used (Mitchell *et al*, 2019).  
690 Illustrator for biological sequences (IBS) web server was used to present biological sequences  
691 (Liu *et al*, 2015). Multiple sequence alignments were performed (Madeira *et al*, 2019) or using  
692 BoxShade multiple sequence alignments (Swiss institute of bioinformatics).

## 693 **Data availability**

694

695 The mass spectrometry data from this publication have been deposited to PRIDE  
696 (<http://www.ebi.ac.uk/pride/archive/>) with the data set identifier PXD028484. Biochemical  
697 source data is provided (Table EV1).

698 **Expanded View** for this article is available online.

## 699 **Acknowledgements**

700

701 We thank Professor Tim Dafforn for kindly providing us styrene maleic acid (SMA)  
702 copolymer, Joao A. Paulo, Ph.D. for helpful exchange and Mrs Renata Feret for technical  
703 discussions. We are very grateful to Syngenta and the Milner Therapeutics Institute for  
704 excellent infrastructural support. Electron microscopy was performed using the facilities at

705 CAIC (Cambridge Advanced Imaging Centre, University of Cambridge). Funding was  
706 provided by BBSRC (BB/P021107/1) and Syngenta.

## 707 **Author Contributions**

708 Conceptualization, BD, DK, CNGG, LC, FGE, SR, and KSL; Methodology, DK, BD, CNGG,  
709 RMLQ, GJ, MJD, DPM, and KHM; Data examination, BD, DK, CNGG, LCF, RMLQ, and  
710 DPM; Manuscript preparation, BD, DK, CNGG, LCF, FE, SR, and KSL, with contributions of  
711 all authors.

## 712 **Conflict of interest**

713 The authors declare that they have no conflict of interest.

## 714 **Reference**

- 715 Alexander JK, Govind AP, Drisdell RC, Blanton MP, Vallejo Y, Lam TT, Green WN (2010)  
716 Palmitoylation of nicotinic acetylcholine receptors. *J Mol Neurosci* 40: 12-40
- 717 Barnstedt O, Oswald D, Felsenberg J, Brain R, Moszynski JP, Talbot CB, Perrat PN, Waddell  
718 S (2016) Memory-Relevant Mushroom Body Output Synapses Are Cholinergic. *Neuron*  
719 89: 1237–1247
- 720 Blanc M, David F, Abrami L, Migliozi D, Armand F, Bürgi J, van der Goot FG (2015)  
721 SwissPalm: Protein Palmitoylation database. *F1000Research* 4: 261
- 722 Bologna G, Yvon C, Duvaud S, Veuthey AL (2004) N-terminal myristoylation predictions by  
723 ensembles of neural networks. *Proteomics* 4: 1626-1632
- 724 Carbon S, Douglass E, Dunn N, Good B, Harris NL, Lewis SE, Mungall CJ, Basu S,  
725 Chisholm RL, Dodson RJ, *et al* (2019) The Gene Ontology Resource: 20 years and still  
726 GOing strong. *Nucleic Acids Res* 47: D330-D338
- 727 Chambers C, Cutler P, Huang YH, Goodchild JA, Blythe J, Wang CK, Bigot A, Kaas Q,  
728 Craik DJ, Sabbadin D, *et al* (2019) Insecticidal spider toxins are high affinity positive  
729 allosteric modulators of the nicotinic acetylcholine receptor. *FEBS Lett* 593: 1336-1350
- 730 Cheng H, Fan C, Zhang SW, Wu ZS, Cui ZC, Melcher K, Zhang CH, Jiang Y, Cong Y, Xu  
731 HE (2015) Crystallization scale purification of  $\alpha 7$  nicotinic acetylcholine receptor from  
732 mammalian cells using a BacMam expression system. *Acta Pharmacol Sin* 36: 1013-  
733 1023
- 734 Dacosta CJB, Dey L, Therien JPD, Baenziger JE (2013) A distinct mechanism for activating  
735 uncoupled nicotinic acetylcholine receptors. *Nat Chem Biol* 9: 701-707
- 736 Dacosta CJB, Free CR, Sine SM (2015) Stoichiometry for  $\alpha$ -bungarotoxin block of  $\alpha 7$   
737 acetylcholine receptors. *Nat Commun* 6: 8057
- 738 Dellisanti CD, Yao Y, Stroud JC, Wang ZZ, Chen L (2007) Crystal structure of the  
739 extracellular domain of nAChR  $\alpha 1$  bound to  $\alpha$ -bungarotoxin at 1.94 Å resolution. *Nat*  
740 *Neurosci* 10, 953-962



- 741 Denisov IG & Sligar SG (2016) Nanodiscs for structural and functional studies of membrane  
742 proteins. *Nat Struct Mol Biol* 23: 481-486
- 743 Depner H, Lützkendorf J, Babkir HA, Sigrist SJ, Holt MG (2014) Differential centrifugation-  
744 based biochemical fractionation of the *Drosophila* adult CNS. *Nat Protoc* 9: 2796-2808
- 745 Eng JK, McCormack AL, Yates JR (1994) An approach to correlate tandem mass spectral  
746 data of peptides with amino acid sequences in a protein database. *J Am Soc Mass*  
747 *Spectrom* 5: 976-989
- 748 Fang P, Ji Y, Silbern I, Doebele C, Ninov M, Lenz C, Oellerich T, Pan KT, Urlaub H (2020)  
749 A streamlined pipeline for multiplexed quantitative site-specific N-glycoproteomics. *Nat*  
750 *Commun* 11: 5268
- 751 Fayyazuddin A, Zaheer MA, Hiesinger PR, Bellen HJ (2006) The Nicotinic Acetylcholine  
752 Receptor  $\alpha 7$  Is Required for an Escape Behavior in *Drosophila*. *PLoS Biol* 4: e63
- 753 Gault J, Liko I, Landreh M, Shutin D, Bolla JR, Jefferies D, Agasid M, Yen HY, Ladds  
754 MJGW, Lane DP, *et al* (2020) Combining native and ‘omics’ mass spectrometry to  
755 identify endogenous ligands bound to membrane proteins. *Nat Methods* 17: 505-508
- 756 Geladaki A, Britovšek NK, Breckels LM, Smith TS, Vennard OL, Mulvey CM, Crook OM,  
757 Gatto L, Lilley KS (2019) Combining LOPIT with differential ultracentrifugation for  
758 high-resolution spatial proteomics. *Nat Commun* 10: 331
- 759 Ginestet C (2011) ggplot2: elegant graphics for data analysis. In *ggplot2: elegant graphics*  
760 *for data analysis*, Wickham H (ed), 2<sup>nd</sup> edn, pp 1-245. New York, NY: Springer-Verlag
- 761 Gobom J, Nordhoff E, Mirgorodskaya E, Ekman R, Roepstorff P (1999) Sample purification  
762 and preparation technique based on nano-scale reversed-phase columns for the sensitive  
763 analysis of complex peptide mixtures by matrix-assisted laser desorption/ionization  
764 mass spectrometry. *J Mass Spectrom* 34: 105-116
- 765 Goddard TD, Huang CC, Meng EC, Pettersen EF, Couch GS, Morris JH, Ferrin TE (2018)  
766 UCSF ChimeraX: Meeting modern challenges in visualization and analysis. *Protein Sci*  
767 27: 14-25
- 768 Häggglund P, Bunkenborg J, Elortza F, Jensen ON, Roepstorff P (2004) A new strategy for  
769 identification of N-glycosylated proteins and unambiguous assignment of their  
770 glycosylation sites using HILIC enrichment and partial deglycosylation. *J Proteome Res*  
771 3: 556-566
- 772 Houchat JN, Dissanamossi BM, Landagaray E, Mathé-Allainmat M, Cartereau A, Graton J,  
773 Lebreton J, Le Questel JY, Thany SH (2019) Mode of action of sulfoxafloz on  $\alpha$ -  
774 bungarotoxin-insensitive nAChR1 and nAChR2 subtypes: Inhibitory effect of  
775 imidacloprid. *Neurotoxicology* 74: 132-138
- 776 Huang DW, Sherman BT, Lempicki RA (2009) Systematic and integrative analysis of large  
777 gene lists using DAVID bioinformatics resources. *Nat Protoc* 4: 44-57
- 778 Ihaka R & Gentleman R (1996) R: A Language for Data Analysis and Graphics. *J Comput*  
779 *Graph Stat* 5: 299-314
- 780 Ihara M, Furutani S, Shigetou S, Shimada S, Niki K, Komori Y, Kamiya M, Koizumi W,  
781 Magara L, Hikida M, *et al* (2020) Cofactor-enabled functional expression of fruit fly,  
782 honeybee, and bumblebee nicotinic receptors reveals picomolar neonicotinoid actions.

- 783 *Proc Natl Acad Sci USA* 117: 16283-16291
- 784 Jones AK, Davis P, Hodgkin J, Sattelle DB (2007) The nicotinic acetylcholine receptor gene  
785 family of the nematode *Caenorhabditis elegans*: An update on nomenclature. *Invert*  
786 *Neurosci* 7:129-31
- 787 Kaji H, Kamiie JI, Kawakami H, Kido K, Yamauchi Y, Shinkawa T, Taoka M, Takahashi N,  
788 Isobe T (2007) Proteomics reveals n-linked glycoprotein diversity in *Caenorhabditis*  
789 *elegans* and suggests an atypical translocation mechanism for integral membrane  
790 proteins. *Mol Cell Proteomics* 6: 2100-2109
- 791 Kalxdorf M, Günthner I, Becher I, Kurzawa N, Knecht S, Savitski MM, Eberl HC,  
792 Bantscheff M (2021) Cell surface thermal proteome profiling tracks perturbations and  
793 drug targets on the plasma membrane. *Nat Methods* 18: 84-91
- 794 Kanehisa M, Furumichi M, Sato Y, Ishiguro-Watanabe M, Tanabe M (2020) KEGG:  
795 integrating viruses and cellular organisms. *Nucleic Acids Res* 49: D545-D551
- 796 Koenig T, Menze BH, Kirchner M, Monigatti F, Parker KC, Patterson T, Steen JJ,  
797 Hamprecht FA, Steen H (2008) Robust prediction of the MASCOT score for an  
798 improved quality assessment in mass spectrometric proteomics. *J Proteome Res* 7: 3708-  
799 3717
- 800 Kondo S, Takahashi T, Yamagata N, Imanishi Y, Katow H, Hiramatsu S, Lynn K, Abe A,  
801 Kumaraswamy A, Tanimoto H (2020) Neurochemical Organization of the *Drosophila*  
802 Brain Visualized by Endogenously Tagged Neurotransmitter Receptors. *Cell Rep* 30:  
803 284-297.e5
- 804 Korona D, Koestler SA, Russell S (2017) Engineering the *Drosophila* Genome for  
805 Developmental Biology. *J Dev Biol* 5: 16
- 806 Korona D, Nightingale D, Fabre B, Nelson M, Fischer B, Johnson G, Lees J, Hubbard S,  
807 Lilley K, Russell S (2020) Characterisation of protein isoforms encoded by the  
808 *Drosophila* Glycogen Synthase kinase 3 gene *shaggy*. *PLoS One* 15: e0236679
- 809 Krogh A, Larsson B, Von Heijne G, Sonnhammer ELL (2001) Predicting transmembrane  
810 protein topology with a hidden Markov model: Application to complete genomes. *J Mol*  
811 *Biol* 305: 567-580
- 812 Lansdell SJ, Collins T, Goodchild J, Millar NS (2012) The *Drosophila* nicotinic  
813 acetylcholine receptor subunits D $\alpha$ 5 and D $\alpha$ 7 form functional homomeric and  
814 heteromeric ion channels. *BMC Neurosci* 13: 73
- 815 Lansdell SJ & Millar NS (2004) Molecular characterization of D $\alpha$ 6 and D $\alpha$ 7 nicotinic  
816 acetylcholine receptor subunits from *Drosophila*: Formation of a high-affinity  $\alpha$ -  
817 bungarotoxin binding site revealed by expression of subunit chimeras. *J Neurochem* 90:  
818 479-489
- 819 Lee SC, Knowles TJ, Postis VLG, Jamshad M, Parslow RA, Lin YP, Goldman A, Sridhar P,  
820 Overduin M, Muench SP, *et al* (2016) A method for detergent-free isolation of  
821 membrane proteins in their local lipid environment. *Nat Protoc* 11: 1149–1162
- 822 Liu MY & Casida JE (1993) High affinity binding of [3h]imidacloprid in the insect  
823 acetylcholine receptor. *Pestic Biochem Physiol* 46: 40-46
- 824 Liu W, Xie Y, Ma J, Luo X, Nie P, Zuo Z, Lahrmann U, Zhao Q, Zheng Y, Zhao Y, *et al*

- 825 (2015) IBS: An illustrator for the presentation and visualization of biological sequences.  
826 *Bioinformatics* 31: 3359-61
- 827 Loo RR, Dales N, Andrews PC (1996) The effect of detergents on proteins analyzed by  
828 electrospray ionization. *Methods Mol Biol* 61:141-160
- 829 Madeira F, Park YM, Lee J, Buso N, Gur T, Madhusoodanan N, Basutkar P, Tivey ARN,  
830 Potter SC, Finn RD, *et al* (2019) The EMBL-EBI search and sequence analysis tools  
831 APIs in 2019. *Nucleic Acids Res* 47: W636-W641
- 832 Maldonado-Hernández R, Quesada O, Colón-Sáez JO, Lasalde-Dominicci JA (2020)  
833 Sequential purification and characterization of *Torpedo californica* nAChR-DC  
834 supplemented with CHS for high-resolution crystallization studies. *Anal Biochem* 610:  
835 113887
- 836 Martens C, Shekhar M, Borysik AJ, Lau AM, Reading E, Tajkhorshid E, Booth PJ, Politis A  
837 (2018) Direct protein-lipid interactions shape the conformational landscape of secondary  
838 transporters. *Nat Commun* 9: 4151
- 839 Mitchell AL, Attwood TK, Babbitt PC, Blum M, Bork P, Bridge A, Brown SD, Chang HY,  
840 El-Gebali S, Fraser MI, *et al* (2019) InterPro in 2019: Improving coverage, classification  
841 and access to protein sequence annotations. *Nucleic Acids Res* 47: D351-D360
- 842 Mulcahy MJ, Paulo JA, Hawrot E (2018) Proteomic Investigation of Murine Neuronal  $\alpha$ 7-  
843 Nicotinic Acetylcholine Receptor Interacting Proteins. *J Proteome Res* 17: 3959-3975
- 844 Perry T, Chen W, Ghazali R, Yang YT, Christesen D, Martelli F, Lumb C, Luong HNB,  
845 Mitchell J, Holien JK, *et al* (2021) Role of nicotinic acetylcholine receptor subunits in  
846 the mode of action of neonicotinoid, sulfoximine and spinosyn insecticides in  
847 *Drosophila melanogaster*. *Insect Biochem Mol Biol* 131: 103547
- 848 Perry T, Heckel DG, McKenzie JA, Batterham P (2008) Mutations in D $\alpha$ 1 or D $\beta$ 2 nicotinic  
849 acetylcholine receptor subunits can confer resistance to neonicotinoids in *Drosophila*  
850 *melanogaster*. *Insect Biochem Mol Biol* 38: 520-528
- 851 Perry T, Somers J, Yang YT, Batterham P (2015) Expression of insect  $\alpha$ 6-like nicotinic  
852 acetylcholine receptors in *Drosophila melanogaster* highlights a high level of  
853 conservation of the receptor: spinosyn interaction. *Insect Biochem Mol Biol* 64: 106-115
- 854 Pierleoni A, Martelli PL, Casadio R (2008) PredGPI: A GPI-anchor predictor. *BMC*  
855 *Bioinformatics* 9: 392
- 856 Queiroz RML, Smith T, Villanueva E, Marti-Solano M, Monti M, Pizzinga M, Mirea D-M,  
857 Ramakrishna M, Harvey RF, Dezi V, *et al* (2019) Comprehensive identification of  
858 RNA-protein interactions in any organism using orthogonal organic phase separation  
859 (OOPS). *Nat Biotechnol* 37: 169-178
- 860 Quesada O, González-Freire C, Ferrer MC, Colón-Sáez JO, Fernández-García E, Mercado J,  
861 Dávila A, Morales R, Lasalde-Dominicci JA (2016) Uncovering the lipidic basis for the  
862 preparation of functional nicotinic acetylcholine receptor detergent complexes for  
863 structural studies. *Sci Rep* 6: 32766
- 864 Rahman MM, Teng J, Worrell BT, Noviello CM, Lee M, Karlin A, Stowell MHB, Hibbs RE  
865 (2020) Structure of the Native Muscle-type Nicotinic Receptor and Inhibition by Snake  
866 Venom Toxins. *Neuron* 106: 952-962.e5

- 867 Rappsilber J, Mann M, Ishihama Y (2007) Protocol for micro-purification, enrichment, pre-  
868 fractionation and storage of peptides for proteomics using StageTips. *Nat Protoc* 2:  
869 1896–1906
- 870 Rohde PD, Madsen LS, Neumann Arvidson SM, Loeschke V, Demontis D, Kristensen TN  
871 (2016) Testing candidate genes for attention-deficit/hyperactivity disorder in fruit flies  
872 using a high throughput assay for complex behavior. *Fly (Austin)* 10: 25-34
- 873 Rstudio Team (2020) RStudio: Integrated Development for R. *Rstudio, PBC, Boston, MA*  
874 URL <http://www.rstudio.com/>
- 875 Salgado VL (2021) Selective actions of insecticides on desensitizing and non-desensitizing  
876 nicotinic acetylcholine receptors in cockroach (*Periplaneta americana*) neurons. *Pest*  
877 *Manag Sci* 77: 3663-3672
- 878 Schmidt-Nielsen BK, Gepner JI, Teng NNH, Hall LM (1977) Characterization of an  $\alpha$ -  
879 bungarotoxin binding component from *Drosophila melanogaster*. *J Neurochem* 29:  
880 1013-1029
- 881 Shevchenko A, Tomas H, Havliš J, Olsen JV, Mann M (2007) In-gel digestion for mass  
882 spectrometric characterization of proteins and proteomes. *Nat Protoc* 1: 2856–2860
- 883 Sobotzki N, Schafroth MA, Rudnicka A, Koetemann A, Marty F, Goetze S, Yamauchi Y,  
884 Carreira EM, Wollscheid B (2018) HATRIC-based identification of receptors for orphan  
885 ligands. *Nat Commun* 9: 1519
- 886 Somers J, Luong HNB, Mitchell J, Batterham P, Perry T (2017) Pleiotropic effects of loss of  
887 the Da1 subunit in *Drosophila melanogaster*: Implications for insecticide resistance.  
888 *Genetics* 205: 263-271
- 889 Sormanni P, Amery L, Ekizoglou S, Vendruscolo M, Popovic B (2017) Rapid and accurate in  
890 silico solubility screening of a monoclonal antibody library. *Sci Rep* 7: 8200
- 891 Sormanni P, Aprile FA, Vendruscolo M (2015) The CamSol method of rational design of  
892 protein mutants with enhanced solubility. *J Mol Biol* 427: 478-490
- 893 Su H & O’Dowd DK (2003) Fast synaptic currents in *Drosophila* mushroom body kenyon  
894 cells are mediated by  $\alpha$ -bungarotoxin-sensitive nicotinic acetylcholine receptors and  
895 picrotoxin-sensitive GABA receptors. *J Neurosci* 23: 9246–9253
- 896 Tackenberg MC, Giannoni-Guzmán MA, Sanchez-Perez E, Doll CA, Agosto-Rivera JL,  
897 Broadie K, Moore D, McMahan DG (2020) Neonicotinoids disrupt circadian rhythms  
898 and sleep in honey bees. *Sci Rep* 10: 17929
- 899 Tsirigos KD, Elofsson A, Bagos PG (2016) PRED-TMBB2: Improved topology prediction  
900 and detection of beta-barrel outer membrane proteins. *Bioinformatics* 32: i665-i671
- 901 Wang H, Yu M, Ochani M, Amella CA, Tanovic M, Susarla S, Li JH, Wang H, Yang H,  
902 Ulloa L, *et al* (2003) Nicotinic acetylcholine receptor  $\alpha 7$  subunit is an essential regulator  
903 of inflammation. *Nature* 421: 384-388
- 904 Wu P, Ma D, Pierzchala M, Wu J, Yang LC, Mai X, Chang X, Schmidt-Glenewinkel T  
905 (2005) The *Drosophila* acetylcholine receptor subunit D $\alpha 5$  is part of an  $\alpha$ -bungarotoxin  
906 binding acetylcholine receptor. *J Biol Chem* 280: 20987-20994
- 907 Xu X, Bao H, Shao X, Zhang Y, Yao X, Liu Z, Li Z (2010) Pharmacological characterization

908 of cis-nitromethylene neonicotinoids in relation to imidacloprid binding sites in the  
909 brown planthopper, *Nilaparvata lugens*. *Insect Mol Biol* 19: 1-8

910 Zuo YY, Xue YX, Wang ZY, Ren X, Aioub AAA, Wu YD, Yang YH, Hu ZN (2021)  
911 Knockin of the G275E mutation of the nicotinic acetylcholine receptor (nAChR)  $\alpha 6$   
912 confers high levels of resistance to spinosyns in *Spodoptera exigua*. *Insect Sci* 0: 1-9

913

## 914 **Figure Legends**

### 915 **Figure 1. Morphological and locomotor phenotypes in *nAChR* subunit mutants.**

916 A Adult males from indicated *nAChR* subunit null mutants. Arrows indicate strong curled  
917 abdomen phenotypes.

918 B Graph of locomotor activity determined in climbing assays as a percentage of wild-  
919 type. Error bars represent standard deviation from 5 replicates.

920

### 921 **Figure 2. $\omega$ -Hexatoxin-Hv1a and $\alpha$ -Bungarotoxin target different nAChR subunits.**

922 A Bar graph of the survival rate, measured as the percentage of pupae formed, following  
923 larval injection of 2.5 nmol/g Hv1a in the indicated homozygous lines. Mean  $\pm$  SD of  
924 3 independent replicates of 10 larvae per replicate.  $**P=0.0035$  (one-way ANOVA  
925 ( $F_{(11,24)}=4.99$ ,  $P=0.0005$  with Bonferroni's multiple comparisons test). 3 independent  
926 replicates in each group (10 injected larvae in total).

927 B Survival rate following larval injection of 1.25 nmol/g  $\alpha$ -Btx. Mean  $\pm$  SD of 3  
928 independent replicates of 10 larvae per replicate.  $**P<0.001$ ,  $***P=0.0001$  (one-way  
929 ANOVA ( $F_{(11,24)}=7.921$ ,  $P<0.0001$ , followed by Bonferroni's multiple comparisons  
930 test). 3 independent replicates in each group (10 injected larvae in total).  $w^{1118}$  is the  
931 wild-type base stock, *THattp40* and *THattP2* are the Cas9 lines used to establish the  
932 mutants,  $w^{1118}$  + PBS represents the injection control.

933

### 934 **Figure 3. Forming styrene maleic acid lipid particles (SMALPs).**

935 A Schematic representation of the SMALPs extraction and nAChRs pull-down for mass  
936 spectrometric analysis.

937 B Negative staining of extracted SMALPs by transmission electron microscopy. Scale bar  
938 100 nm.

939 C Fluorescence signal of uncoupled  $\alpha$ -Btx in solution before and after coupling to affinity  
940 beads (two-tailed t-test,  $***P<0.001$ ,  $n=4$ ).

941 D, E Negative staining of extracted SMALPs after  $\alpha$ -Btx coupled pull-downs. Ring-like  
942 protein structures are boxed (Scale bar = 100 nm) with an example in the magnified  
943 image (Scale bar = 20 nm). A top view of the nAChR structure from PDB entry 4HQF  
944 is shown for reference.

945

946 **Figure 4. Identification of proteins enriched by SMALP extraction.**

- 947 A Number of identified proteins in affinity pull-down samples solubilized with or without  
948 SMA, two-tailed t-test,  $**P<0.01$ , n=6 or 8 replicates per condition.
- 949 B MS/MS spectrum counts from samples solubilized with or without SMA, ns = not  
950 significant after two-tailed t-test with n=6 or 8.
- 951 C Calculated hydrophobicity score of amino acid residues found in protein sequences  
952 obtained with and without SMA solubilisation,  $****P<0.0001$ , two-tailed t-test, n=3  
953 per condition.
- 954 D GO term (cellular compartment) enrichment of proteins identified with and without  
955 SMA solubilisation, n=4 or 11.
- 956 E Predicted numbers of proteins containing transmembrane helices obtained with or  
957 without SMA solubilisation, n=4 or 8.
- 958 F, G Analysis of solubility and hydrophobicity of receptors identified with and without SMA  
959 solubilisation ( $r^2= -0.56$ ,  $P<0.0001$ , n=4) and of transmembrane receptor helices  
960 ( $r^2=0.56$ ,  $P<0.01$ , n=4).
- 961 H Solubility score of individual nAChR subunits.  
962

963 **Figure 5. Three nAChR  $\alpha$ -subunits are binding to  $\alpha$ -Bungarotoxin ( $\alpha$ -Btx).**

- 964 A Graphical representation of ten nAChR subunits. The position of protein domains and signal  
965 peptides are shown.
- 966 B Identified peptides of D $\alpha$ 5, D $\alpha$ 6 and D $\alpha$ 7 nAChR subunits in pull-downs using  $\alpha$ -Btx affinity  
967 beads. Found peptides in ligand-binding and cytoplasmic domain are highlighted in red.
- 968 C Numbers of identified unique peptides in wild-type pull-downs using affinity beads in absence  
969 and presence of  $\alpha$ -Btx, n=3. Deleting *nAChRa5*, *nAChRa6*, *nAChRa7* and performing pull-  
970 downs identified unique peptides of nAChR subunits suggesting that functional complexes can  
971 be formed in null alleles, n=3.
- 972 D KEGG pathway enrichment analysis of pull-downs in wild-type and *nAChRa5*, *nAChRa6*,  
973 *nAChRa7* null alleles, Fisher's exact test, n=3. Protein counts with *P* values of enriched  
974 pathways are shown. *P* values of  $\leq 0.05$  are to be considered as strongly enriched with default  
975 threshold of 0.1.  
976

977 **Figure 6. N-glycosylation sites in nAChR subunits.**

- 978 A Diagrammatic representation of nAChR subunit glycopeptide enrichment. Pull-downs  
979 with  $\alpha$ -Btx affinity beads enrich for nAChRs and after proteolytic digestion  
980 glycopeptides were enriched. Glycopeptides were deglycosylated with Endo H or  
981 PNGase F and analyzed by mass spectrometry.
- 982 B Low numbers of glycopeptides (average 20) are detected in flow through fractions.
- 983 C Numbers of identified glycopeptides according to site probabilities are shown (n=3).
- 984 D Shared glycopeptide identified in the ligand-binding domain of D $\alpha$ 5 and D $\alpha$ 7, an N-  
985 linked glycosylated asparagine (N) residue is highlighted.

986 E Deglycosylated peptide with either Endo H or PNGase F and contains either an N-  
987 acetylhexosamine or is deamidated on asparagine (N2). The two different modifications  
988 on the same peptide lead to a different monoisotopic mass (MH+ [Da]). Peptide  
989 contains an additional carbamidomethyl on cysteine (C5).  
990

991 **Figure 7. *In vivo* imaging of endogenously tagged D $\alpha$ 6 nAChR subunit.**

992 A-G Live imaging of fly brains carrying a C-terminal EGFP fusion into the endogenous  
993 *nAChR $\alpha$ 6* locus.  
994 A-C D $\alpha$ 6 subunit in 2<sup>nd</sup>, early and late 3<sup>rd</sup> instar larvae brain, respectively. Visible  
995 localization in ventral nerve cord (VNC), mushroom bodies (MB), and optic lobes  
996 (OL). Scale bar = 100  $\mu$ m.  
997 D D $\alpha$ 6 subunit in mushroom bodies of 3<sup>rd</sup> instar larvae with detectable fluorescence signal  
998 in Kenyon cells (KC), calyx (CX), peduncle (PED), dorsal lobes (DL) and medial lobes  
999 (ML). Scale bar = 100  $\mu$ m.  
1000 E D $\alpha$ 6 subunit was observed in developing optic lobes, lamina (LAM) and medulla  
1001 (MED) of later 3<sup>rd</sup> instar larvae. Scale bar = 100  $\mu$ m.  
1002 F D $\alpha$ 6 subunit on the external structures of developing lobes in later 3<sup>rd</sup> instar larvae.  
1003 Scale bar = 100  $\mu$ m.  
1004 G D $\alpha$ 6 subunit in adult fly brain, strong signal detected in mushroom bodies (MB) and  
1005 optic lobe (OL). Scale bar = 100  $\mu$ m.  
1006 H Schematic summary of D $\alpha$ 6 subunit expression during different developmental stages,  
1007 2<sup>nd</sup> and 3<sup>rd</sup> instar larvae and adult fly, (L2, L3 and Adult, respectively) in which the  
1008 green lines indicate the localization of the D $\alpha$ 6 subunit.  
1009  
1010  
1011  
1012  
1013  
1014  
1015  
1016  
1017  
1018  
1019  
1020  
1021  
1022  
1023  
1024

1025 **Appendix Tables and Figures legends**

1026

1027 **Table of Contents**

1028

1029 Appendix Table S1 Climbing ability ..... 32

1030 Appendix Table S2 *Drosophila* larval injection of  $\omega$ -Hexatoxin-Hv1a &  $\alpha$ -Bungarotoxin ..... 33

1031 Appendix Table S3 Identified nAChR peptides in pull-downs with  $\alpha$ -Bungarotoxin ..... 33

1032 Appendix Table S4 Identified nAChR peptides in pull-downs without  $\alpha$ -Bungarotoxin..... 33

1033 Appendix Table S5 List of gRNAs and oligonucleotides used for cloning ..... 36

1034 Appendix Table S6 List of oligonucleotides used for amplification from genomic DNA ..... 37

1035 Appendix Table S7 C-terminal tagging of nAChRa6 with FSVS ..... 38

1036 Appendix Figure S1 GO terms and predicted membrane proteins ..... 38

1037 Appendix Figure S2 Identified peptides in ligand-binding and cytoplasmic domain..... 38

1038 Appendix Figure S3 Superimposed nAChR  $\alpha$ -subunits structure together with identified peptide 39

1039 Appendix Figure S4 Glycosylation sites of nAChR subunits ..... 39

1040

1041

1042

1043 **Appendix Table S1 Climbing ability.**

| 10 days old flies |                  |            |               |            |               |            |               |         |                    |
|-------------------|------------------|------------|---------------|------------|---------------|------------|---------------|---------|--------------------|
| number            | receptor         | series 1   |               | series 2   |               | series 3   |               | average | standard deviation |
|                   | subunit          | percentage | actual change | percentage | actual change | percentage | actual change | percent | STEV               |
| 1                 | nAChR $\alpha$ 1 | 30         | 37.5          | 40         | 50            | 50         | 71.4          | 53      | 17.2               |
| 2                 | nAChR $\alpha$ 2 | 40         | 50            | 40         | 50            | 50         | 71.4          | 57.1    | 12.4               |
| 3                 | nAChR $\alpha$ 3 | 0          | 0             | 20         | 25            | 30         | 42.9          | 22.6    | 21.5               |
| 4                 | nAChR $\alpha$ 4 | 70         | 87.5          | 80         | 100           | 60         | 85.7          | 91.1    | 7.8                |
| 5                 | nAChR $\alpha$ 5 | 60         | 75            | 70         | 87.5          | 50         | 71.4          | 78      | 8.4                |
| 6                 | nAChR $\alpha$ 6 | 40         | 50            | 50         | 62.5          | 50         | 71.4          | 61.3    | 10.8               |
| 7                 | nAChR $\alpha$ 7 | 70         | 87.5          | 80         | 100           | 70         | 100           | 95.8    | 7.2                |
| 8                 | nAChR $\beta$ 1  | 30         | 37.5          | 30         | 37.5          | 20         | 28.6          | 34.5    | 5.2                |
| 9                 | nAChR $\beta$ 2  | 80         | 100           | 80         | 100           | 60         | 85.7          | 95.2    | 8.2                |
| 10                | nAChR $\beta$ 3  | 80         | 100           | 80         | 100           | 70         | 100           | 100     | 0                  |
| 11                | WT               | 80         | 100           | 80         | 100           | 70         | 100           | 100     | 0                  |

1044

1045

1046

1047

1048



1049 **Appendix Table S2 *Drosophila* larval injection of  $\omega$ -Hexatoxin-Hv1a &  $\alpha$ -Bungarotoxin.**

|                      | Strain            | Injected cpd              | Survival (% of pupae formed after injection) |       |       |         |                    |
|----------------------|-------------------|---------------------------|----------------------------------------------|-------|-------|---------|--------------------|
|                      |                   |                           | Rep1                                         | Rep2  | Rep3  | Average | Standard Deviation |
| CONTROL              | w <sup>1118</sup> | 2.5 nmol/g Hv1a           | 0                                            | 0     | 0     | 0       | 0                  |
| CONTROL - Cas9 lines | THattP40          | 2.5 nmol/g Hv1a           | 0                                            | 0     | 0     | 0       | 0                  |
| CONTROL - Cas9 lines | THattP2           | 2.5 nmol/g Hv1a           | 0                                            | 0     | 0     | 0       | 0                  |
| nAChR CRISPR mutant  | nAChR $\alpha$ 1  | 2.5 nmol/g Hv1a           | 25                                           | 0     | 0     | 8.33    | 14.43              |
| nAChR CRISPR mutant  | nAChR $\alpha$ 2  | 2.5 nmol/g Hv1a           | 25                                           | 0     | 0     | 8.33    | 14.43              |
| nAChR CRISPR mutant  | nAChR $\alpha$ 3  | 2.5 nmol/g Hv1a           | 0                                            | 0     | 0     | 0       | 0                  |
| nAChR CRISPR mutant  | nAChR $\alpha$ 4  | 2.5 nmol/g Hv1a           | 25                                           | 33.33 | 66.67 | 41.67   | 22.05              |
| nAChR CRISPR mutant  | nAChR $\alpha$ 5  | 2.5 nmol/g Hv1a           | 0                                            | 0     | 0     | 0       | 0                  |
| nAChR CRISPR mutant  | nAChR $\alpha$ 6  | 2.5 nmol/g Hv1a           | 0                                            | 0     | 0     | 0       | 0                  |
| nAChR CRISPR mutant  | nAChR $\alpha$ 7  | 2.5 nmol/g Hv1a           | 0                                            | 0     | 0     | 0       | 0                  |
| nAChR CRISPR mutant  | nAChR $\beta$ 2   | 2.5 nmol/g Hv1a           | 25                                           | 33.33 | 66.67 | 41.67   | 22.05              |
| nAChR CRISPR mutant  | nAChR $\beta$ 3   | 2.5 nmol/g Hv1a           | 0                                            | 33.33 | 0     | 11.11   | 19.25              |
| Injection CONTROL    | w <sup>1118</sup> | PBS                       | 100                                          | 100   | 100   | 100     | 0                  |
| CONTROL              | w <sup>1118</sup> | 1.25 nmol/g $\alpha$ -Btx | 0                                            | 0     | 0     | 0       | 0                  |
| CONTROL - Cas9 lines | THattP40          | 1.25 nmol/g $\alpha$ -Btx | 0                                            | 0     | 0     | 0       | 0                  |
| CONTROL - Cas9 lines | THattP2           | 1.25 nmol/g $\alpha$ -Btx | 0                                            | 0     | 0     | 0       | 0                  |
| nAChR CRISPR mutant  | nAChR $\alpha$ 1  | 1.25 nmol/g $\alpha$ -Btx | 0                                            | 0     | 33.33 | 11.11   | 19.25              |
| nAChR CRISPR mutant  | nAChR $\alpha$ 2  | 1.25 nmol/g $\alpha$ -Btx | 25                                           | 0     | 33.33 | 19.44   | 17.35              |
| nAChR CRISPR mutant  | nAChR $\alpha$ 3  | 1.25 nmol/g $\alpha$ -Btx | 0                                            | 0     | 33.33 | 11.11   | 19.25              |
| nAChR CRISPR mutant  | nAChR $\alpha$ 4  | 1.25 nmol/g $\alpha$ -Btx | 0                                            | 33.33 | 0     | 11.11   | 19.25              |
| nAChR CRISPR mutant  | nAChR $\alpha$ 5  | 1.25 nmol/g $\alpha$ -Btx | 50                                           | 66.67 | 66.67 | 61.11   | 9.62               |
| nAChR CRISPR mutant  | nAChR $\alpha$ 6  | 1.25 nmol/g $\alpha$ -Btx | 25                                           | 66.67 | 66.67 | 52.78   | 24.06              |
| nAChR CRISPR mutant  | nAChR $\alpha$ 7  | 1.25 nmol/g $\alpha$ -Btx | 50                                           | 100   | 66.67 | 72.22   | 25.46              |
| nAChR CRISPR mutant  | nAChR $\beta$ 2   | 1.25 nmol/g $\alpha$ -Btx | 0                                            | 33.33 | 0     | 11.11   | 19.25              |
| nAChR CRISPR mutant  | nAChR $\beta$ 3   | 1.25 nmol/g $\alpha$ -Btx | 0                                            | 0     | 0     | 0       | 0                  |
| Injection CONTROL    | w <sup>1118</sup> | PBS                       | 100                                          | 100   | 100   | 100     | 0                  |

1050

1051 **Appendix Table S3 Identified nAChR peptides in pull-downs with  $\alpha$ -Bungarotoxin.**

1052 Peptides from D $\alpha$ 3, D $\alpha$ 5, D $\alpha$ 6, D $\alpha$ 7 and D $\beta$ 3 nAChR subunits are listed and found [N] times within  
 1053 individual replicates. Protein domains are marked with: Ed extracellular-, Id Intracellular-, LBD ligand-  
 1054 binding-, and Non-domain localization. The mass-to-charge ratio (m/z) of the precursor ions, the  
 1055 protonated monoisotopic masses, the theoretical MH<sup>+</sup> masses in Dalton [Da] and peptide modifications  
 1056 are listed. Peptide modifications are listed with: (C) Carbamidomethylation; (N,Q) Deamidation; (H)  
 1057 N-acetylhexosamine (HexNAc); (M) Oxidation.

1058 **Appendix Table S4 Identified nAChR peptides in pull-downs without  $\alpha$ -Bungarotoxin.**

1059 Identified peptides of nAChR subunits which are found in control pull-down samples without  $\alpha$ -  
 1060 Bungarotoxin ( $\alpha$ -Btx).

1061

**Appendix Table S3 Identified nAChR peptides in pull-downs with  $\alpha$ -Bungarotoxin.**

| Subunit                                  | Accession              | Sequence                   | Found [N] | Domain | m/z [Da]  | MH+ [Da]     | Theo. MH+ [Da] | Modification        |
|------------------------------------------|------------------------|----------------------------|-----------|--------|-----------|--------------|----------------|---------------------|
| nAChR $\alpha$ 3                         | Q9W3G6                 | ATLnYTGR                   | 2         | LBD    | 549.77423 | 1098.54119   | 1098.54258     | H4 or position 2, 6 |
| nAChR $\alpha$ 5                         | Q7KT97                 | TVYGQGGDDGSIGPIGSTR        | 7         | Id     | 890.42413 | 1779.84099   | 1779.85078     |                     |
| nAChR $\alpha$ 5                         | Q7KT97                 | TVYGqGDDGSIGPIGSTR         | 2         | Id     | 890.93036 | 1780.85344   | 1780.83480     | Q5                  |
| nAChR $\alpha$ 5                         | Q7KT97                 | FITDQLR                    | 7         | Id     | 446.74768 | 892.48808    | 892.48869      |                     |
| nAChR $\alpha$ 5                         | Q7KT97                 | KHQILSDVELKER              | 1         | Id     | 399.47717 | 1594.8869    | 1594.8911      |                     |
| nAChR $\alpha$ 5                         | Q7KT97                 | SSTEYELGLILK               | 1         | Id     | 676.86945 | 1352.7316    | 1352.7308      |                     |
| nAChR $\alpha$ 5, $\alpha$ 7             | Q7KTF97, Q9VWI9        | LEWNDMNLNLR                | 1         | LBD    | 595.78156 | 1190.55583   | 1190.5623      |                     |
| nAChR $\alpha$ 5, $\alpha$ 7             | Q7KTF97, Q9VWI9        | NnGScLYVPPGIFK             | 2         | LBD    | 884.93384 | 1768.86040   | 1768.85745     | H2, C5              |
| nAChR $\alpha$ 5, $\alpha$ 7             | Q7KTF97, Q9VWI9        | NnGScLYVPPGIFK             | 2         | LBD    | 783.88092 | 1566.75456   | 1566.76209     | N2, C5              |
| nAChR $\alpha$ 5, $\alpha$ 7             | Q7KTF97, Q9VWI9        | nnGScLYVPPGIFK             | 2         | LBD    | 784.39069 | 1567.77410   | 1567.74611     | N1, N2, C5          |
| nAChR $\alpha$ 6                         | Q7KTF9                 | ELQFITAR                   | 4         | Id     | 489.27380 | 977.54033    | 977.54146      |                     |
| nAChR $\alpha$ 6                         | Q7KTF9                 | ELqFITAR                   | 1         | Id     | 489.7753  | 978.54332    | 978.52547      | Q3                  |
| nAChR $\alpha$ 6                         | Q7KTF9                 | TADIHEMPPWIK               | 1         | Non    | 719.36407 | 1437.72087   | 1437.71950     |                     |
| nAChR $\alpha$ 6                         | Q7KTF9                 | TILLSNR                    | 4         | Id     | 408.75095 | 816.49462    | 816.49378      |                     |
| nAChR $\alpha$ 6                         | Q7KTF9                 | ADDEAEELIGDWK              | 4         | Id     | 681.3179  | 1361.6161785 | 1361.62195     |                     |
| nAChR $\alpha$ 6                         | Q7KTF9                 | KADDEAELIGDWK              | 1         | Id     | 745.36469 | 1489.72209   | 1489.71691     |                     |
| nAChR $\alpha$ 6                         | Q7KTF9                 | KTILLSNR                   | 2         | Id     | 472.79971 | 944.59215    | 944.58874      |                     |
| nAChR $\alpha$ 5, $\alpha$ 6, $\alpha$ 7 | Q7KT97, Q7KTF9, Q9VWI9 | IDITWFPFDDQR               | 3         | LBD    | 776.87292 | 1552.7386    | 1552.7431      |                     |
| nAChR $\alpha$ 5, $\alpha$ 6, $\alpha$ 7 | Q7KT97, Q7KTF9, Q9VWI9 | SLLANVLDIDDDFR             | 3         | Id     | 803.40924 | 1605.8112    | 1605.8119      |                     |
| nAChR $\alpha$ 6, $\alpha$ 7             | Q7KTF9, Q9VWI9         | IDITWFPFDDqR               | 1         | LBD    | 777.37311 | 1553.73894   | 1553.7209      | Q11                 |
| nAChR $\alpha$ 7                         | Q9VWI9                 | SLLANVLDIDDDFRcNHR         | 1         | Id     | 544.01544 | 2173.0399    | 2173.0455      | C15                 |
| nAChR $\alpha$ 7                         | Q9VWI9                 | KQqIQNVELKER               | 6         | Id     | 504.95410 | 1512.84774   | 1512.84927     |                     |
| nAChR $\alpha$ 7                         | Q9VWI9                 | KQqIQNVELK                 | 1         | Id     | 614.35730 | 1227.70732   | 1227.70556     |                     |
| nAChR $\alpha$ 7                         | Q9VWI9                 | KQqIQNVELKER               | 1         | Id     | 502.29062 | 1513.8573    | 1513.8333      | N3                  |
| nAChR $\alpha$ 7                         | Q9VWI9                 | QGDDGSGVGPVGPAGPVVDGR      | 12        | Id     | 918.44794 | 1835.88860   | 18335.88823    |                     |
| nAChR $\alpha$ 7                         | Q9VWI9                 | qGDDGSGVGPVGPAGPVVDGR      | 1         | Id     | 918.94897 | 1936.89067   | 1836.87225     | Q1                  |
| nAChR $\alpha$ 7                         | Q9VWI9                 | QQIQNVELK                  | 1         | Id     | 550.30487 | 1099.60246   | 1099.61060     |                     |
| nAChR $\alpha$ 7                         | Q9VWI9                 | EDETSDITR                  | 1         | Non    | 533.23535 | 1065.46343   | 1065.46947     |                     |
| nAChR $\alpha$ 7                         | Q9VWI9                 | mQRPGQVGYEcPPPPSSSSSSASGEK | 1         | Id     | 908.41028 | 2723.2163    | 2723.2036      | M1; C11             |
| nAChR $\alpha$ 7                         | Q9VWI9                 | cASATLPHQPTYR              | 2         | Id     | 555.59827 | 1664.7803    | 1664.785       | C1                  |
| nAChR $\alpha$ 7                         | Q9VWI9                 | WITEQLKKEDETSDITR          | 2         | Id     | 698.01874 | 2092.0417    | 2092.0557      |                     |
| nAChR $\alpha$ 7                         | Q9VWI9                 | WITEQLK                    | 1         | Non    | 459.25516 | 917.50304    | 917.50909      |                     |
| nAChR $\alpha$ 7                         | Q9VWI9                 | cNHRCASATLPHQPTYR          | 1         | Id     | 832.89795 | 1664.7886    | 1664.785       | C1                  |
| nAChR $\beta$ 3                          | Q9VPQ8                 | VVLPEnGTAR                 | 1         | LBD    | 629.83380 | 1258.66033   | 1258.66376     | H6 or position 8    |

**Appendix Table S4 Identified nAChR peptides in pull-downs without  $\alpha$ -Bungarotoxin.**

| Subunit                      | Accession          | Sequence             | Found [N] | Domains | m/z [Da]  | MH+ [Da]   | Theo. MH+ [Da] | Modification |
|------------------------------|--------------------|----------------------|-----------|---------|-----------|------------|----------------|--------------|
| nAChR $\alpha$ 1             | A0A0B4KGU3         | LFIQILPK             | 1         | Ed      | 486.31339 | 971.61949  | 917.62882      |              |
| nAChR $\alpha$ 1, $\alpha$ 2 | A0A0B4KGU3, P17644 | LYDDLNSYNR           | 1         | Ed      | 693.3407  | 1385.674   | 1385.66957     |              |
| nAChR $\alpha$ 2             | P17644             | AIDVQLSDVAK          | 2         | Non     | 579.823   | 1158.639   | 1158.636       |              |
| nAChR $\alpha$ 2             | P17644             | VVWTPPAIFK           | 1         | Ed      | 579.3391  | 1157.671   | 1157.671       |              |
| nAChR $\alpha$ 2, $\beta$ 2  | P17644, P25162     | LSQLIEVNLK           | 1         | Ed      | 386.5676  | 1157.692   | 1157.677       |              |
| nAChR $\alpha$ 4             | A8JNX5             | LVSSGYNNSLPK         | 10        | Non     | 639.8441  | 1278.661   | 1278.66884     |              |
| nAChR $\alpha$ 4             | A8JNX5             | LVSSGYnNSLPK         | 1         | Non     | 640.3381  | 1279.669   | 1279.653       | N7           |
| nAChR $\alpha$ 4             | A8JNX5             | LSQLIDVNLK           | 2         | LBD     | 571.8425  | 1142.678   | 1142.678       |              |
| nAChR $\alpha$ 4             | A8JNX5             | SPILNNPAFHSK         | 1         | Non     | 471.24591 | 1411.72318 | 1411.73284     |              |
| nAChR $\alpha$ 4             | A8JNX5             | RPTYNFETSK           | 3         | Non     | 621.80939 | 1242.61150 | 1242.61133     |              |
| nAChR $\alpha$ 4             | A8JNX5             | RPTYnFETSK           | 3         | Non     | 622.3102  | 1243.613   | 1243.595       | N5           |
| nAChR $\alpha$ 4             | A8JNX5             | LYDDLNSYNK           | 2         | LBD     | 679.3725  | 1357.64910 | 1357.66342     |              |
| nAChR $\alpha$ 4             | A8JNX5             | RPTYNFETSKLLK        | 1         | Non     | 621.8079  | 1242.609   | 1242.611       |              |
| nAChR $\beta$ 1              | P04755             | NKNFVDLSDYWK         | 2         | Ed      | 643.8068  | 1286.600   | 1286.605       |              |
| nAChR $\beta$ 1              | P04755             | NFVDLSDYWK           | 4         | Ed      | 643.8044  | 1286.602   | 1286.605       |              |
| nAChR $\beta$ 1              | P04755             | nFVDLSDYWK           | 4         | Ed      | 644.3093  | 1287.611   | 1287.589       | N1           |
| nAChR $\beta$ 1              | P04755             | ILPPTSLVLPK          | 1         | Non     | 737.9825  | 1474.96074 | 1474.96071     |              |
| nAChR $\beta$ 1              | P04755             | ATEAVEFIAEHLR        | 5         | Id      | 495.92743 | 1485.76773 | 1485.76962     |              |
| nAChR $\beta$ 1              | P04755             | VWKPDIIVFNADGNYEVR   | 1         | Ed      | 750.3779  | 2249.119   | 2249.135       |              |
| nAChR $\beta$ 2              | P25162             | LYDDLNSYNR           | 3         | Ed      | 693.34070 | 1385.67412 | 1385.66957     |              |
| nAChR $\beta$ 2              | P25162             | LSqLIEVNLKqVMTTNLWVK | 1         | Ed      | 825.1133  | 2473.325   | 2473.3370      | Q3; Q12      |
| nAChR $\beta$ 2              | P25162             | LSqLIEVNLK           | 2         | Ed      | 386.5676  | 1157.688   | 1157.678       | Q3           |

## Appendix Table S5 List of gRNAs and oligonucleotides used for cloning.

| Knockouts          |                             |                             |                                         |                               |
|--------------------|-----------------------------|-----------------------------|-----------------------------------------|-------------------------------|
| nAChR subunit      | gRNA target name            | gRNA sequence (NGG)         | oligonucleotides name (Forward/Reverse) | oligonucleotides sequence     |
| nAChRα1            | Da1_111(+)                  | 5'CGGAGATGTAGTAGTCCTGCAGG3' | 41_Da1_111_F                            | 5'GTCGCGGAGATGTAGTAGCTCTGC3'  |
|                    |                             |                             | 42_Da1_111_R                            | 5'AAACGCAGGACTACTACATCTCCG3'  |
|                    | Da1_126(-)                  | 5'CCTGCAGGTCGATGCCACCTCG3'  | 43_Da1_126_F                            | 5'GTCGCGAGGTGGGCATCGACCTGC3'  |
|                    |                             |                             | 44_Da1_126_R                            | 5'AAACGCAGGTCGATGCCACCTCG3'   |
| nAChRα2            | Da2_99(+)                   | 5'GCTCCTCTGCGAAACCGTTCAGG3' | 45_Da2_99_F                             | 5'GTCGCTCCTCTGCGAAACCGTTC3'   |
|                    |                             |                             | 46_Da2_99_R                             | 5'AAACGAACGGTTTCGACAGAGGAG3'  |
| nAChRα3            | Da3_18(+)                   | 5'GTCCGGACGCCAGATGTGATCGG3' | 49_Da3_18_F                             | 5'GTCGTCCGGACGCCAGATGTGAT3'   |
|                    |                             |                             | 50_Da3_18_R                             | 5'AAACATCACATCTGGCGTCCGGA3'   |
| nAChRα4            | Da4_19(+)                   | 5'TTGTTGCGACGAACCATACTTGG3' | 53_Da4_19_F                             | 5'GTCGTTGTTGCGACGAACCATACT3'  |
|                    |                             |                             | 54_Da4_19_R                             | 5'AAACAGTATGGTTCGTGCAACAA3'   |
| nAChRα5            | Da5_232(-)                  | 5'CCGGGGATCTCAAGTCGACGTG3'  | 57_Da5_232_F                            | 5'GTCGCACGTCGACTTGAAGATCCC3'  |
|                    |                             |                             | 58_Da5_232_R                            | 5'AAACGGGATCTCAAGTCGACGTG3'   |
|                    | Da5_251(+)                  | 5'CGTGCAAGATCGACATCACGTGG3' | 59_Da5_251_F                            | 5'GTCGCGTCAAGATCGACATCACG3'   |
|                    |                             |                             | 60_Da5_251_R                            | 5'AAACCGTGATGTCGATCTTGACG3'   |
|                    |                             |                             | nAChRα6                                 | Da6_70(+)                     |
| 62_Da6_70_R        | 5'AAACTGCCGGGAAAGAAGATACG3' |                             |                                         |                               |
| nAChRα7            | Da7_1226(+)                 | 5'CATTGACCACCGACGCTCCAGG3'  | 63_Da7_1226_F                           | 5'GTCGCATTGACCACCGACGCTCC3'   |
|                    |                             |                             | 64_Da7_1226_R                           | 5'AAACGGAGCGTCCGGTGGTCAATG3'  |
| nAChRβ1            | Db1_2(+)                    | 5'TGGAGTCTTCTGCAAATCTGG3'   | 67_Db1_2_F                              | 5'GTCGTGGAGTCTTCTGCAAATCC3'   |
|                    |                             |                             | 68_Db1_2_R                              | 5'AAACGGATTTGCAGGAAGACTCCA3'  |
| nAChRβ2            | Db2_955(+)                  | 5'TCAGACCTAACCAAACCGTCAGG3' | 71_Db2_955_F                            | 5'GTCGTGACACCTAACCAAACCGTC3'  |
|                    |                             |                             | 72_Db2_955_R                            | 5'AAACGACGGTTTGGTTAGGTCTGA3'  |
| nAChRβ3            | Db3_466(+)                  | 5'CTTTGAAGTCCAGCGAGGTCTGG3' | 75_Db3_466_F                            | 5'GTCGCTTTGAAGTCCAGCGAGGTCT3' |
|                    |                             |                             | 76_Db3_466_R                            | 5'AAACGACCTCGCTGGACTTCAAAG3'  |
| C-terminal tagging |                             |                             |                                         |                               |
| nAChR subunit      | gRNA target name            | gRNA sequence (NGG)         | oligonucleotides name (Forward/Reverse) | oligonucleotides sequence     |
| nAChRα6            | Da6_181(+)                  | 5'TTGCACGATTATGTGCGGAGCGG3' | 131_Da6_181_F                           | 5'GTCGTTGCACGATTATGTGCGGAG3'  |
|                    |                             |                             | 132_Da6_181_R                           | 5'AAACCTCCGCACATAATCGTGCAA3'  |
|                    | Da6_176(+)                  | 5'CCTTATTGCACGATTATGTGCGG3' | 133_Da6_176_F                           | 5'GTCGCTTATTGCACGATTATGTG3'   |
|                    |                             |                             | 134_Da6_176_R                           | 5'AAACCACATAATCGTGCAATAAGG3'  |

## Appendix Table S6 List of oligonucleotides used for amplification from genomic DNA.

| knockouts        |              |                                         |                           |
|------------------|--------------|-----------------------------------------|---------------------------|
| nAChR subunit    | homology arm | oligonucleotides name (Forward/Reverse) | oligonucleotides sequence |
| nAChR $\alpha$ 1 | Da1_LHA      | Da1_LHA_F1                              | 5'TGGGGGACAAAATAGCATG3'   |
|                  |              | Da1_LHA_R1                              | 5'GGGGAAATGGGCCAACAAAT3'  |
| nAChR $\alpha$ 1 | Da1_RHA      | Da1_RHA_F1                              | 5'GCAGATACTTTCCAGCAGC3'   |
|                  |              | Da1_RHA_R1                              | 5'CCGGCTCCTTGACTACTTTG3'  |
| nAChR $\alpha$ 2 | Da2_LHA      | Da2_LHA_F1                              | 5'ACGAAATGCAAAACCGAGCT3'  |
|                  |              | Da2_LHA_R2                              | 5'CCCAATTTGACCAACACCGT3'  |
| nAChR $\alpha$ 2 | Da2_RHA      | Da2_RHA_F1                              | 5'GCGGGCAGAAAGGTAACAA3'   |
|                  |              | Da2_RHA_R1                              | 5'TCACCTGATCACCGTCGTAG3'  |
| nAChR $\alpha$ 3 | Da3_LHA      | Da3_LHA_F1                              | 5'CTCCAGCCGTTCCAAATCT3'   |
|                  |              | Da3_LHA_R1                              | 5'CAATCTGTGGGTGGAGCAGT3'  |
| nAChR $\alpha$ 3 | Da3_RHA      | Da3_RHA_F1                              | 5'CTGCTCGTGAAGGGAAAGT3'   |
|                  |              | Da3_RHA_R1                              | 5'GATCCGAGCCAGACTAAGCC3'  |
| nAChR $\alpha$ 4 | Da4_LHA      | Da4_LHA_F1                              | 5'GATGAACAACAGGGCAGCAA3'  |
|                  |              | Da4_LHA_R1                              | 5'CAAAACAACAACCGTCACGC3'  |
| nAChR $\alpha$ 4 | Da4_RHA      | Da4_RHA_F1                              | 5'TTAGAGCGTAACAGTGGGCG3'  |
|                  |              | Da4_RHA_R1                              | 5'ACGCCTACAAACCGACAAA3'   |
| nAChR $\alpha$ 5 | Da5_LHA      | Da5_LHA_F1                              | 5'ACCGCATTCTGTGCGCATAT3'  |
|                  |              | Da5_LHA_R1                              | 5'CAGGACGACGTTGGCTTACT3'  |
| nAChR $\alpha$ 5 | Da5_RHA      | Da5_RHA_F1                              | 5'GGATCTTCAAGTCGACGTGC3'  |
|                  |              | Da5_RHA_R1                              | 5'GAGGGTGTGGCTGGATTTTC3'  |
| nAChR $\alpha$ 6 | Da6_LHA      | Da6_LHA_F1                              | 5'TGTGTACGGGTGTGAGACAGA3' |
|                  |              | Da6_LHA_R1                              | 5'TCACACATTGCTTGCCGAAA3'  |
| nAChR $\alpha$ 6 | Da6_RHA      | Da6_RHA_F1                              | 5'GTCAGTTTCTCGCCGAATC3'   |
|                  |              | Da6_RHA_R1                              | 5'CCGAGAGTTGACTGTAGCCA3'  |
| nAChR $\alpha$ 7 | Da7_LHA      | Da7_LHA_F1                              | 5'TGTAACCCCTAGCAGTGCCA3'  |
|                  |              | Da7_LHA_R1                              | 5'TATGATACCGGGTGTAGTGCC3' |
| nAChR $\alpha$ 7 | Da7_RHA      | Da7_RHA_F1                              | 5'CATCCGGTTTCCATAGGCGA3'  |
|                  |              | Da7_RHA_R1                              | 5'ACGGAAATCACAATGCCCT3'   |
| nAChR $\beta$ 1  | Db1_LHA      | Db1_LHA_F1                              | 5'TCATCAACAGCAGGCAGAGA3'  |
|                  |              | Db1_LHA_R1                              | 5'TGGCAATGAGAGCTTGAGA3'   |
| nAChR $\beta$ 1  | Db1_RHA      | Db1_RHA_F1                              | 5'CTGCAAATCCTGGCTGTTGT3'  |
|                  |              | Db1_RHA_R1                              | 5'GTGTGTGTGTGTGGTCTC3'    |
| nAChR $\beta$ 2  | Db2_LHA      | D2b_LHA_F1                              | 5'TCAACTCAGGACAGCACACA3'  |
|                  |              | D2b_LHA_R1                              | 5'ACCACCACTTCTAGTCC3'     |
| nAChR $\beta$ 2  | Db2_RHA      | D2b_RHA_F1                              | 5'CCCATCGCAACTGTAGTCG3'   |
|                  |              | D2b_RHA_R1                              | 5'CATTTCGTCCAGGTAAGTGCG3' |
| nAChR $\beta$ 3  | Db3_LHA      | Db3_LHA_F1                              | 5'AACGGTCCGATGACTTCCT3'   |
|                  |              | Db3_LHA_R1                              | 5'TGAGCATGTTGAGTTCGAG3'   |
| nAChR $\beta$ 3  | Db3_RHA      | Db3_RHA_F1                              | 5'TCCTTCGTCTCTCTTCGT3'    |
|                  |              | Db3_RHA_R1                              | 5'TTCTGCGGGAACTACGACC3'   |

## Appendix Table S6 Continued, List of oligonucleotides used for amplification from genomic DNA.

| C-terminal tagging |              |                                         |                           |
|--------------------|--------------|-----------------------------------------|---------------------------|
| nAChR subunit      | homology arm | oligonucleotides name (Forward/Reverse) | oligonucleotides sequence |
| nAChRα6            | Da6_RHA      | 74_Da6_RHA_F_Gen                        | 5'GGGTTTCTGTTCTTGCCTG3'   |
|                    |              | 75_Da6_RHA_R_Gen                        | 5'GCCCTGCTGATTTGTTTGC3'   |
| nAChRα6            | Da6_LHA      | 76_Da6_LHA_F_Gen                        | 5'CCGATGCTTCCGACGTATCC3'  |
|                    |              | 77_Da6_LHA_R_Gen                        | 5'GCCATACTAGCGCATGACTCT3' |

## Appendix Table S7 C-terminal tagging of nAChRα6 with FSVS.

| C-terminal tagging with FSVS                                                                                       |          |                      |                                                        |
|--------------------------------------------------------------------------------------------------------------------|----------|----------------------|--------------------------------------------------------|
| nAChR subunit                                                                                                      | fragment | site                 | oligonucleotides sequence                              |
| nAChRα6                                                                                                            | 31       | 105_Donor_LHA_Da6    | 5'CGGGCTAATTATGGGGTGTGCCCTGTGCATGCAGAGAATGAAACC3'      |
|                                                                                                                    |          | 106_LHA_Da6_linker_R | 5'CCTTGACAGATTATGTGCGGAGCTGAGAGCAGCACCGTAACCG3'        |
|                                                                                                                    | 32       | 107_linkerTag_F      | 5'GCTCTCAGCTCCGCACATAATCGTCAAGGATCCGCGGAGGGGGC3'       |
|                                                                                                                    |          | 108_RHDA6_Tag_R      | 5'CTAATTCGAGCGTCTTACTTTTCGAACTGGGGATGGCC3'             |
|                                                                                                                    | 33       | 109_TG-RHA_Da6_F     | 5'CCCAGTTCGAAAAGTAAGGACGCTCGAATTAGGCC3'                |
|                                                                                                                    |          | 110_Donor_RHDA6      | 5'AAATTTGTGTGCGCCCTTGAAGTTCGATTGCGCTGCTTAGCTTCATCTG3'  |
| C-terminal tagging with FSVS-loxP-3Px3DsRED-loxP using as a template donors with FSVS tags above (fragments 31-33) |          |                      |                                                        |
| nAChR subunit                                                                                                      | fragment | site                 | oligonucleotides sequence                              |
| nAChRα6                                                                                                            | 34       | 105_Donor_LHA_Da6    | 5'CGGGCTAATTATGGGGTGTGCCCTGTGCATGCAGAGAATGAAACC3'      |
|                                                                                                                    |          | 114_RHDA6_Tag_R      | 5'CTTTTCGAACTGGGGATGGCTCCAAGTCC3'                      |
|                                                                                                                    | 36       | 155_Marker_F1        | 5'CTTGAGCCATCCCCAGTTCGAAAAGTAGTAAGTACCGCGGTATAAC3'     |
|                                                                                                                    |          | 157_Marker_R1        | 5'GGCTTCTATATAACTTCGTATAGCATAAC3'                      |
|                                                                                                                    | 36       | 165_Da6_F_marker     | 5'ATGCTATACGAAGTTATATAGAAGAGCCTAAGGACGCTCGAATTAGGCC3'  |
|                                                                                                                    |          | 110_Donor_RHDA6      | 5'AAATTTGTGTGCGCCCTTGAAGTTCGATTGCGCTGCTTAGCTTCATCTG 3' |

## Appendix Figure S1 GO terms and predicted membrane proteins.

- A, B GO slim term for biological process and for molecular function analysed within samples solubilized without or with SMA, n=4 or 11 per conditions.
- C Predicted β-barrel membrane proteins, two-tailed t-test \*\*\*\* $P < 0.0001$ , n=6 or 10.
- D Palmitoylated proteins, two-tailed t-test \*\*\*\* $P < 0.0001$ , each n=8.
- E Myristoylated proteins, two-tailed t-test \*\*\*\* $P < 0.0001$ , n=6 or 10.
- F GPI-anchored proteins, two-tailed t-test, non-significant ns, n=6 or 10.

## Appendix Figure S2 Identified peptides in ligand-binding and cytoplasmic domain.

- A Shared peptides found in the ligand-binding domains are shown in red.
- B Identified unique (/) and shared (,) peptides in cytoplasmic domains.

### **Appendix Figure S3 Superimposed nAChR $\alpha$ -subunits structure together with identified peptides.**

- A Superimposed nAChR  $\alpha$ -subunit structures from *H. sapiens* (blue, PDB 6USF) and *Torpedo californica* (red, 6UWZ). Extracellular ligand-binding domain (LBD) illustrates a structure similarity.
- B Same superimposed structures bound to  $\alpha$ -Bungarotoxin ( $\alpha$ -Btx, surface structure). Peptides found in LBD are highlighted in green. The homology regions of D $\alpha$ 6 nAChRs LBD are shown in violet.

### **Appendix Figure S4 Glycosylation sites of nAChR subunits.**

- A Multiple sequence alignment of insect  $\alpha$ 7 nAChR subunits compared to sequences of nematodes. The glycosylated ligand-binding domain (LBD) sequence of D $\alpha$ 5 and D $\alpha$ 7 nAChR subunits are shown. Glycosylated asparagine residues highlighted in red are conserved within insects and nematodes (positions: D $\alpha$ 5 422 and D $\alpha$ 7 170 amino acids).
- B Same D $\alpha$ 5 and D $\alpha$ 7 nAChR subunit sequences compared to *T. californica*, *D. rerio*, *M. musculus* and *H. sapiens*.
- C Graphical representation of D $\alpha$ 3 and D $\beta$ 3 nAChR subunits. N-acetylhexosamine (H) modification on asparagine residues are highlighted and are of low site probability  $\leq 80$  %.

# Figures

## Table of Contents

|                                                                                                                                           |           |
|-------------------------------------------------------------------------------------------------------------------------------------------|-----------|
| <b>Figure 1. Morphological and locomotor phenotypes in <i>nAChR</i> subunit mutants.</b> .....                                            | <b>2</b>  |
| <b>Figure 2. <math>\omega</math>-Hexatoxin-Hv1a and <math>\alpha</math>-Bungarotoxin target different nAChR subunits.</b> .....           | <b>3</b>  |
| <b>Figure 3. Forming styrene maleic acid lipid particles (SMALPs)</b> .....                                                               | <b>4</b>  |
| <b>Figure 4. Identification of proteins enriched by SMALP extraction</b> .....                                                            | <b>5</b>  |
| <b>Figure 5. Three nAChR <math>\alpha</math>-subunits are binding to <math>\alpha</math>-bungarotoxin (<math>\alpha</math>-Btx)</b> ..... | <b>6</b>  |
| <b>Figure 6. N-glycosylation sites in nAChR subunits</b> .....                                                                            | <b>7</b>  |
| <b>Figure 7. <i>In vivo</i> imaging of endogenously tagged D<math>\alpha</math>6 nAChR subunit</b> .....                                  | <b>8</b>  |
| <b>Appendix Figure S1 GO terms and predicted membrane proteins</b> .....                                                                  | <b>9</b>  |
| <b>Appendix Figure S2 Identified peptides in ligand-binding and cytoplasmic domain</b> .....                                              | <b>10</b> |
| <b>Appendix Figure S3 Superimposed nAChR <math>\alpha</math>-subunits structure together with identified peptides</b> .....               | <b>11</b> |
| <b>Appendix Figure S4 Glycosylation sites of nAChR subunits</b> .....                                                                     | <b>12</b> |



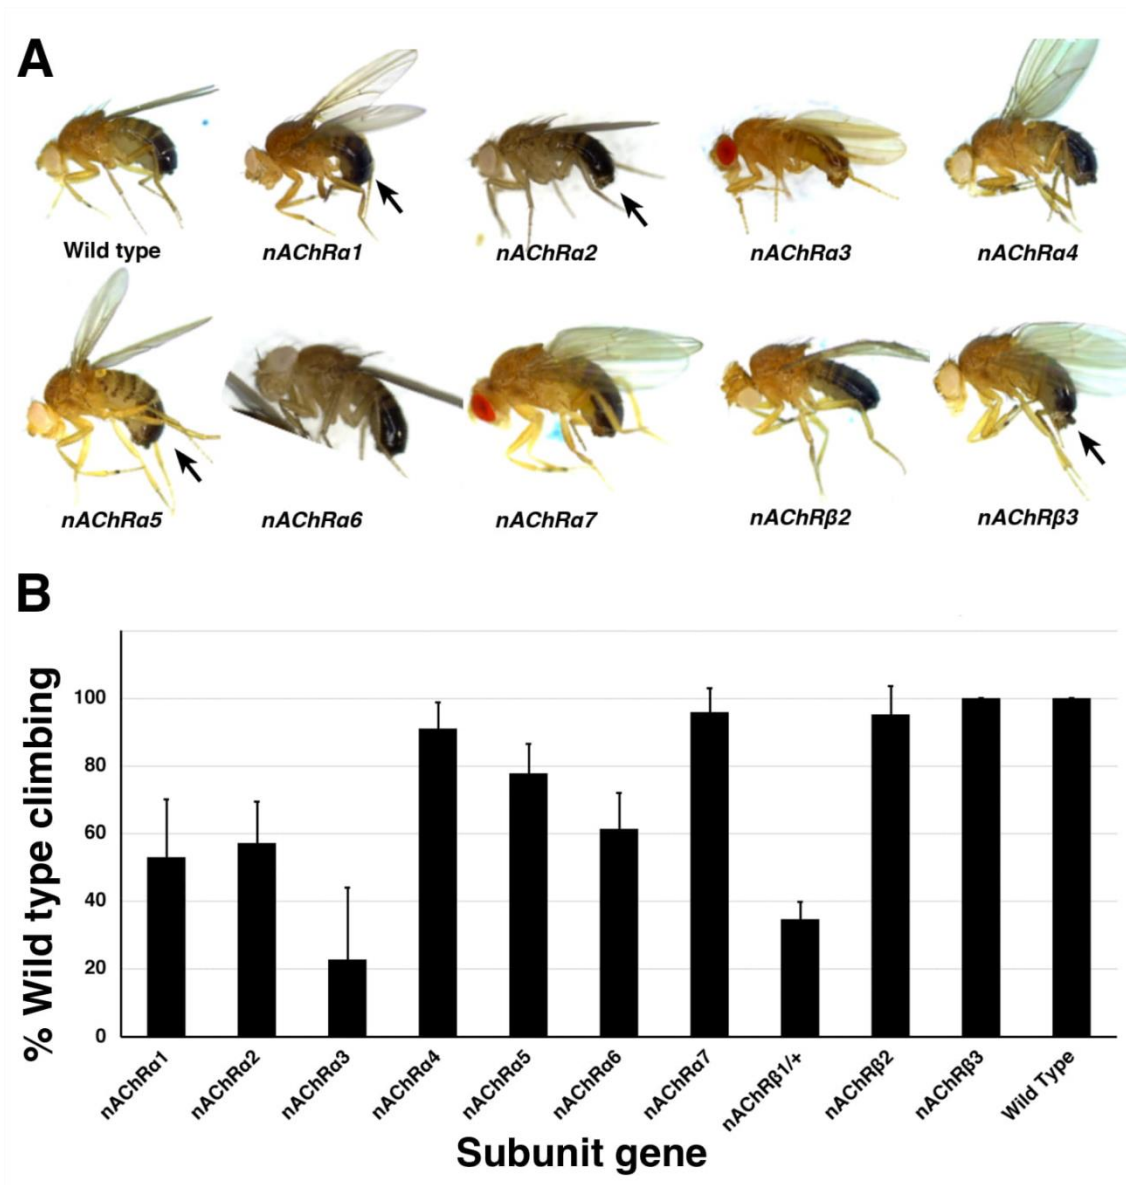

Figure 1. Morphological and locomotor phenotypes in *nAChR* subunit mutants.

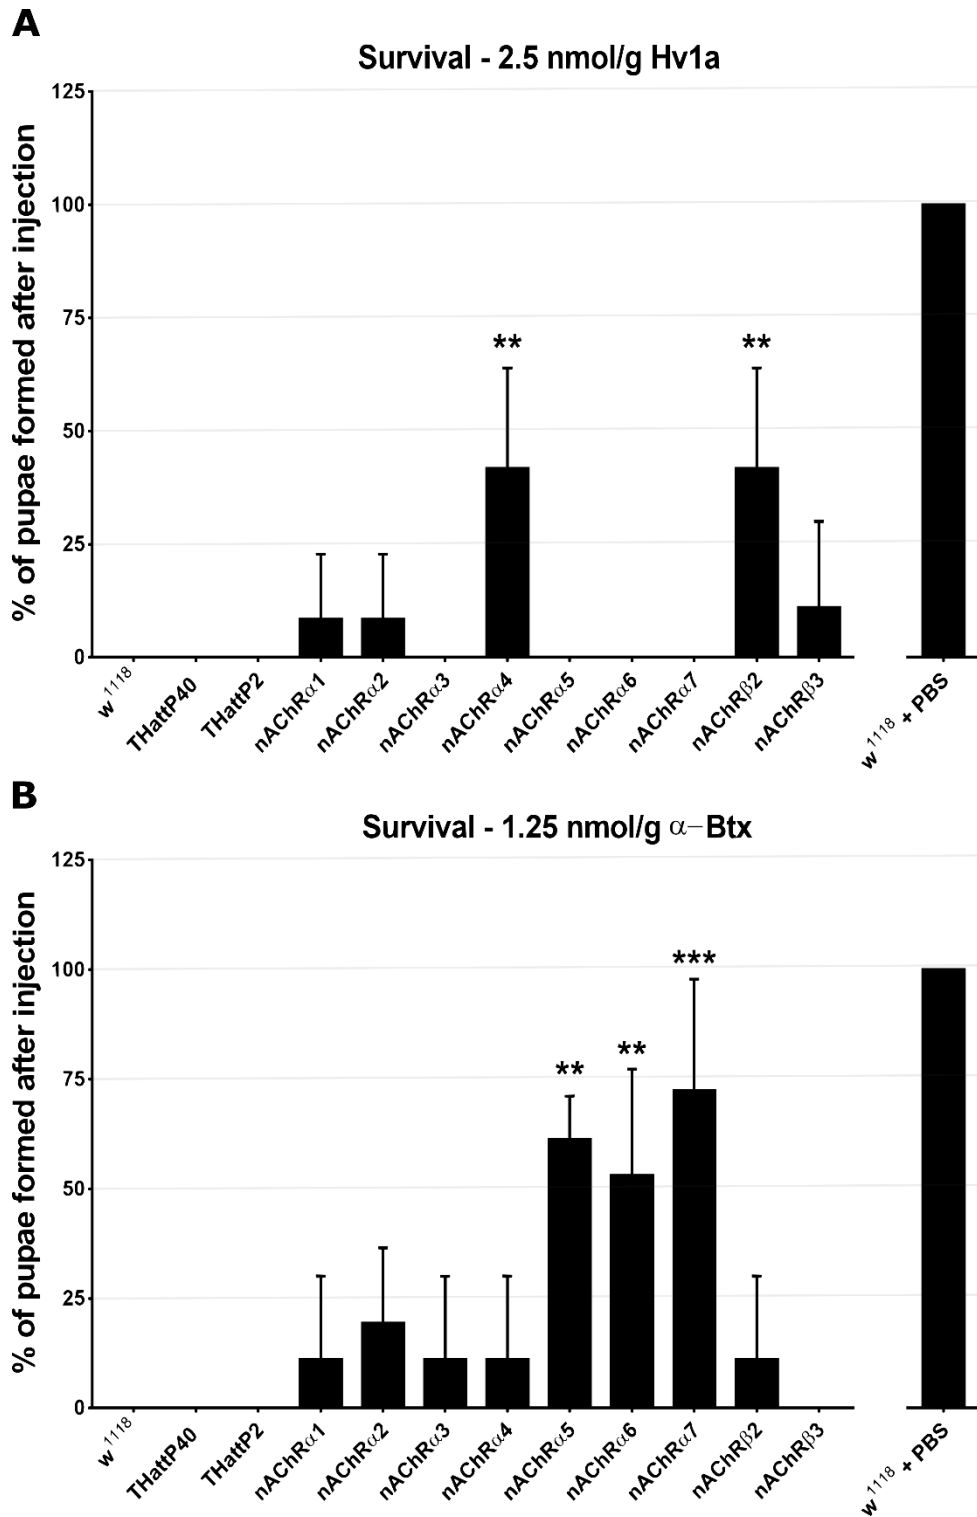

Figure 2.  $\omega$ -Hexatoxin-Hv1a and  $\alpha$ -Bungarotoxin target different nAChR subunits.

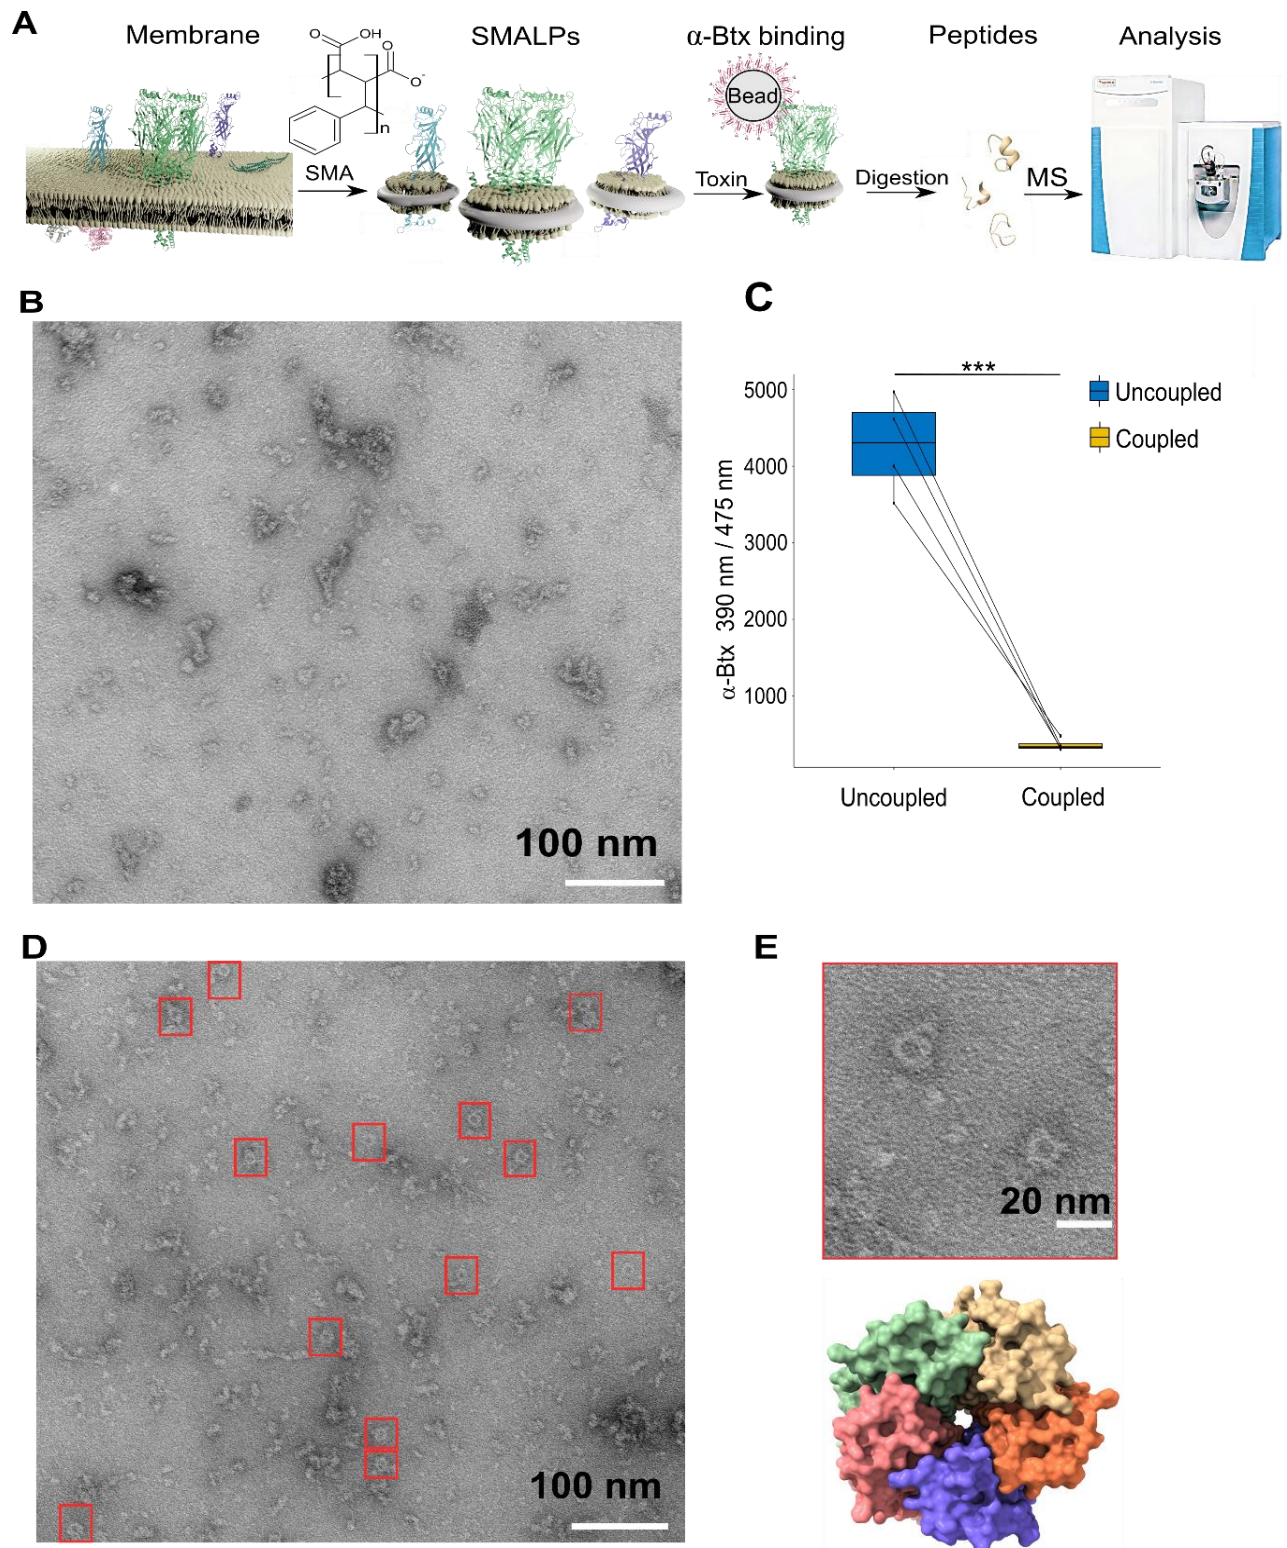

**Figure 3. Forming styrene maleic acid lipid particles (SMALPs).**

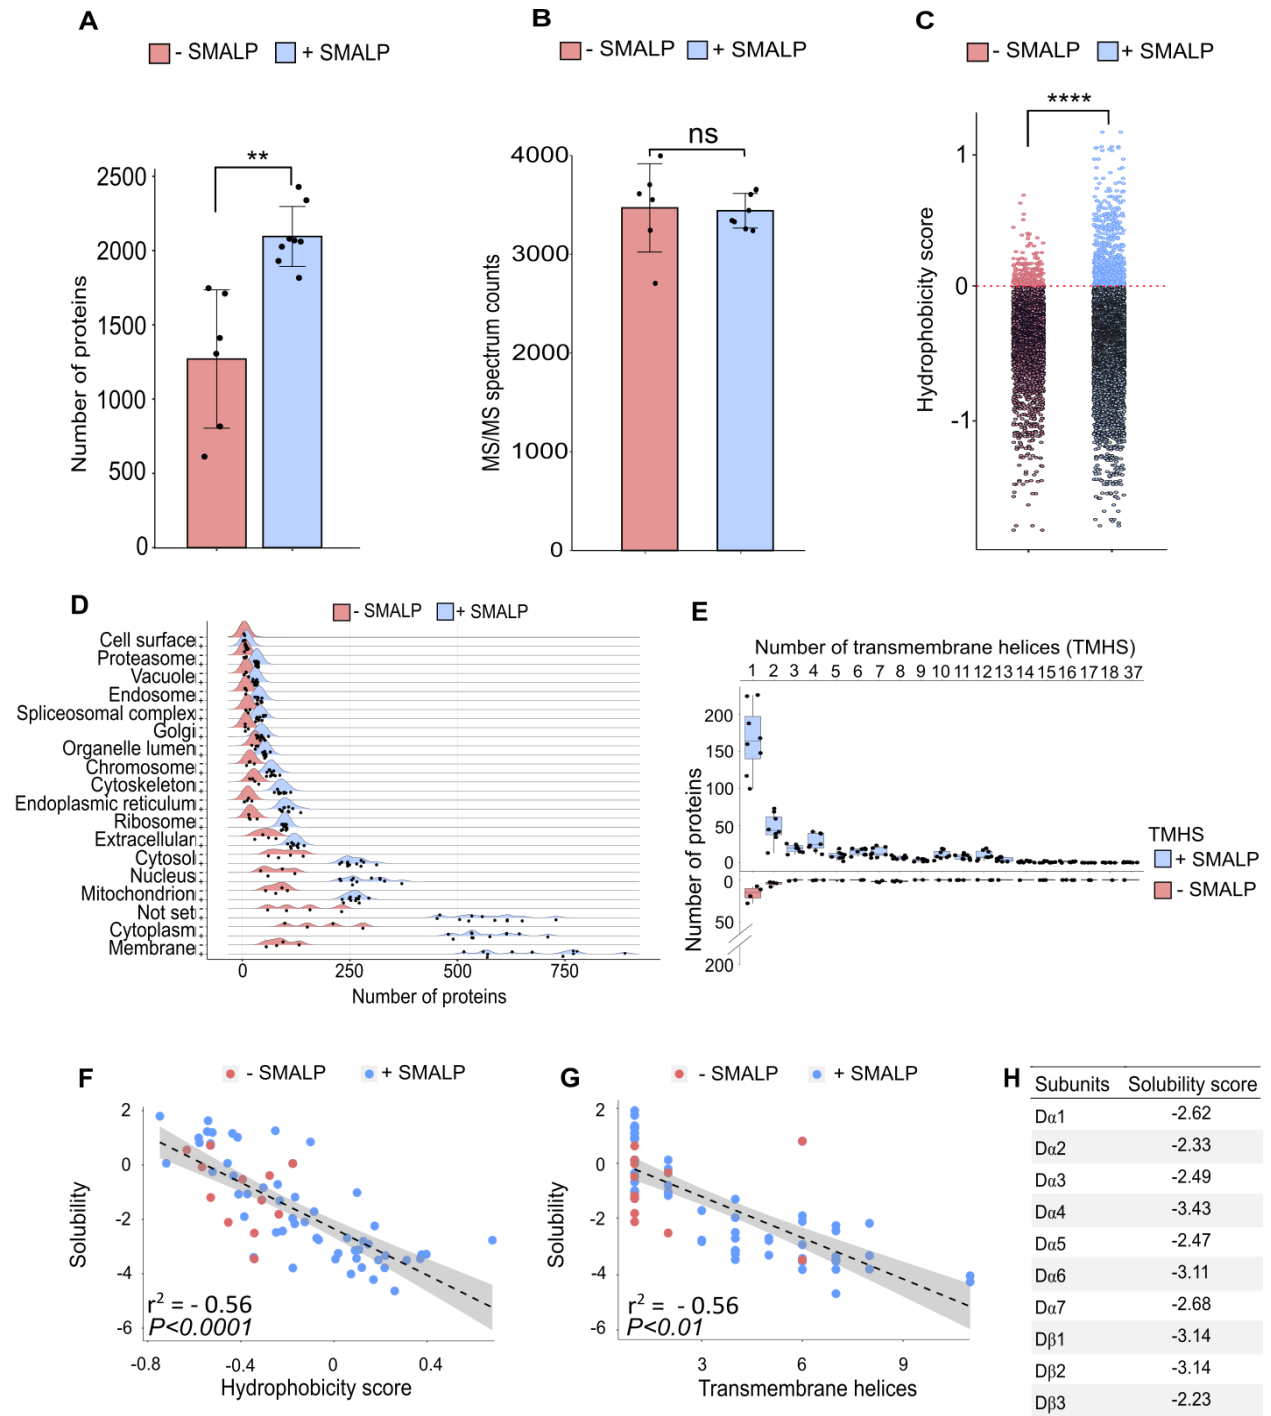

**Figure 4. Identification of proteins enriched by SMALP extraction.**

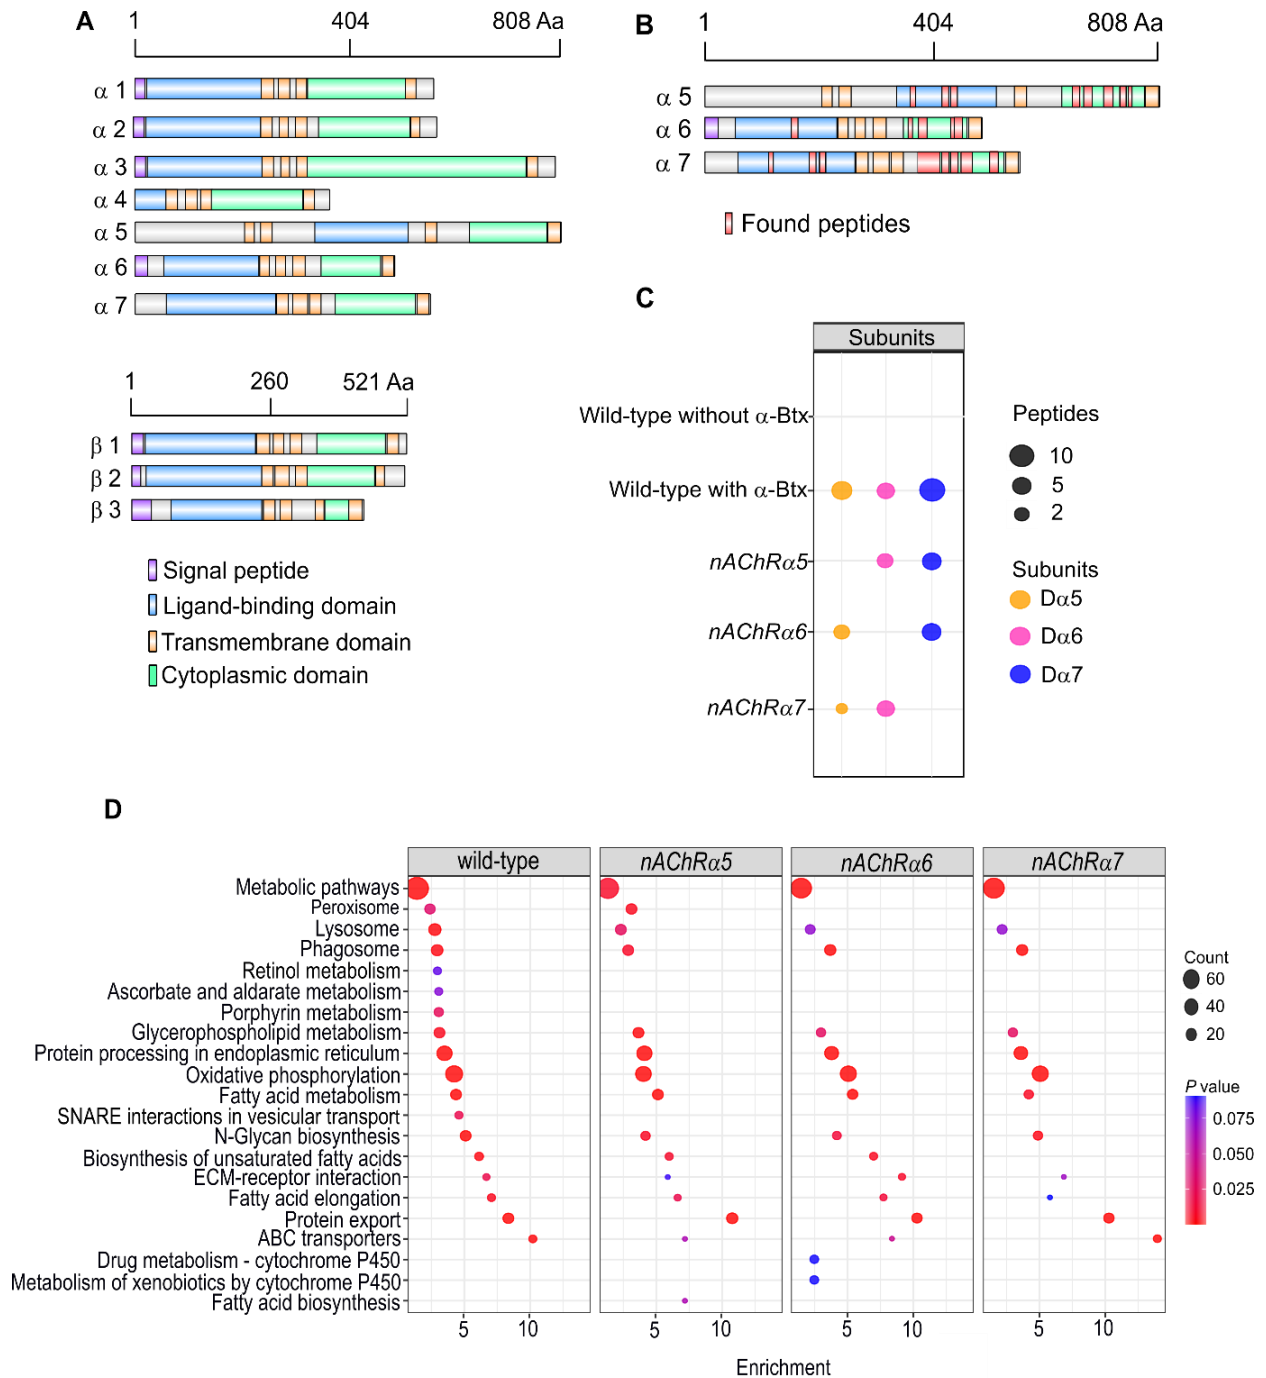

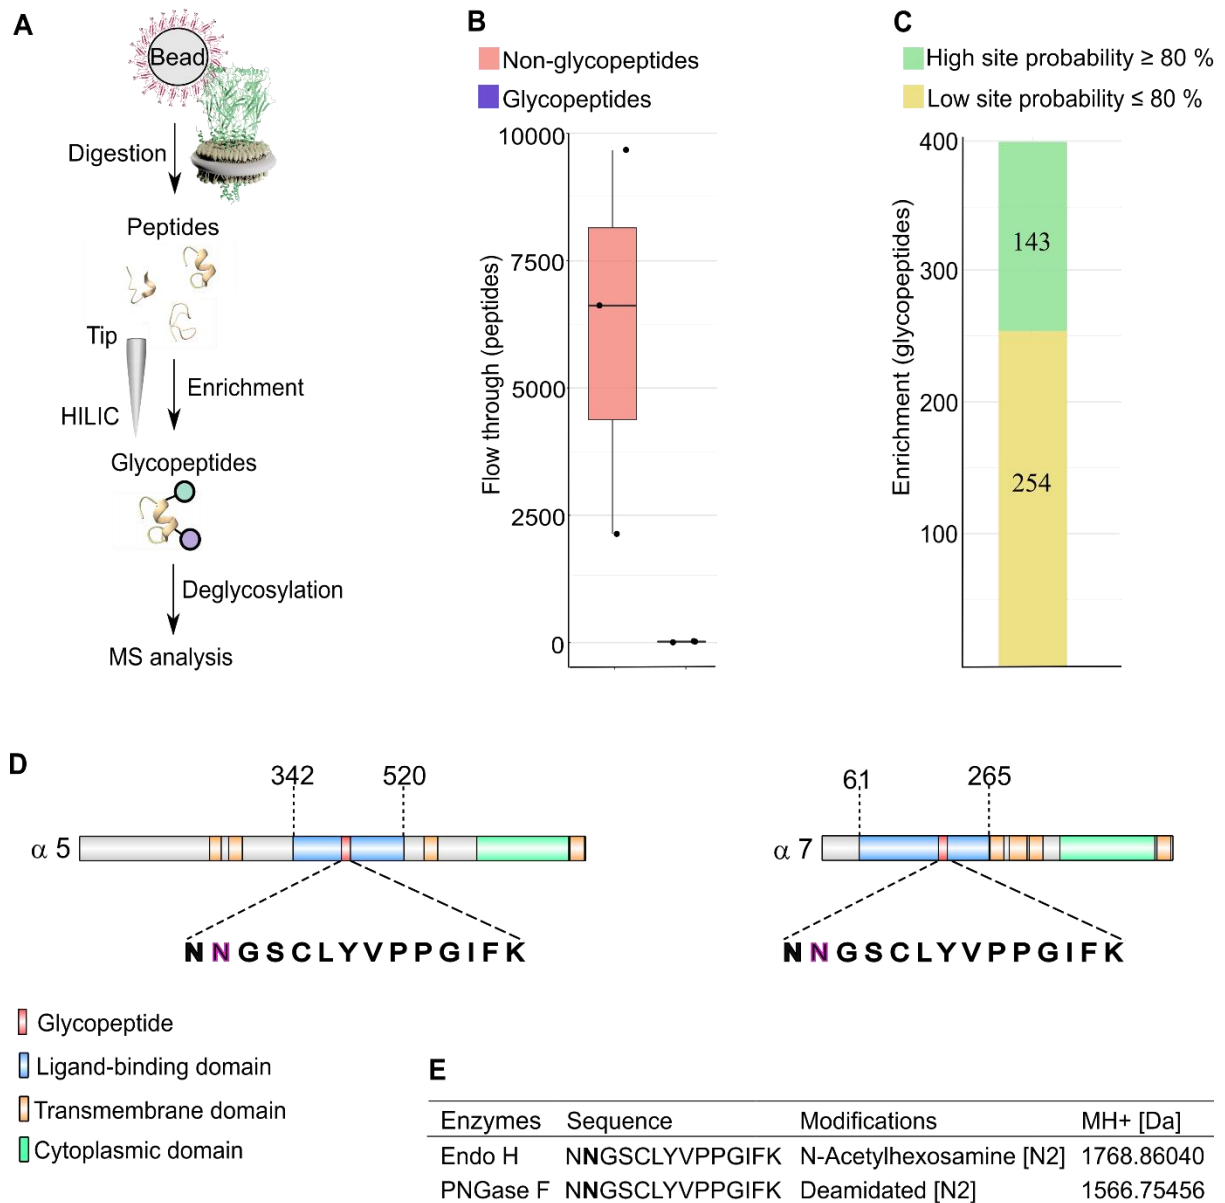

**Figure 6. N-glycosylation sites in nAChR subunits.**

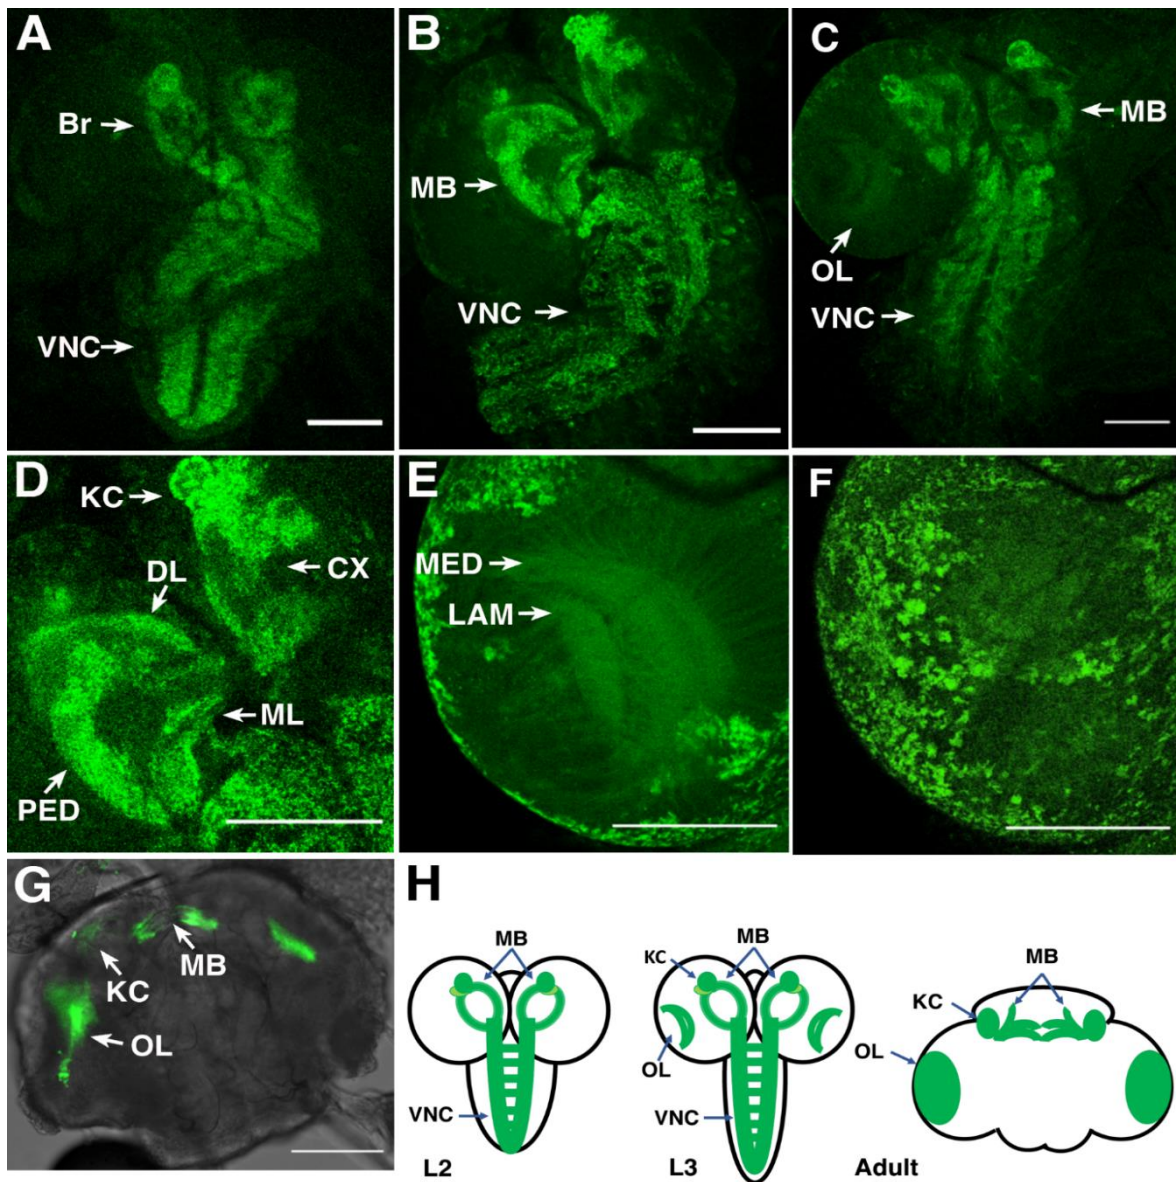

**Figure 7.** *In vivo* imaging of endogenously tagged  $D\alpha 6$  nAChR subunit.

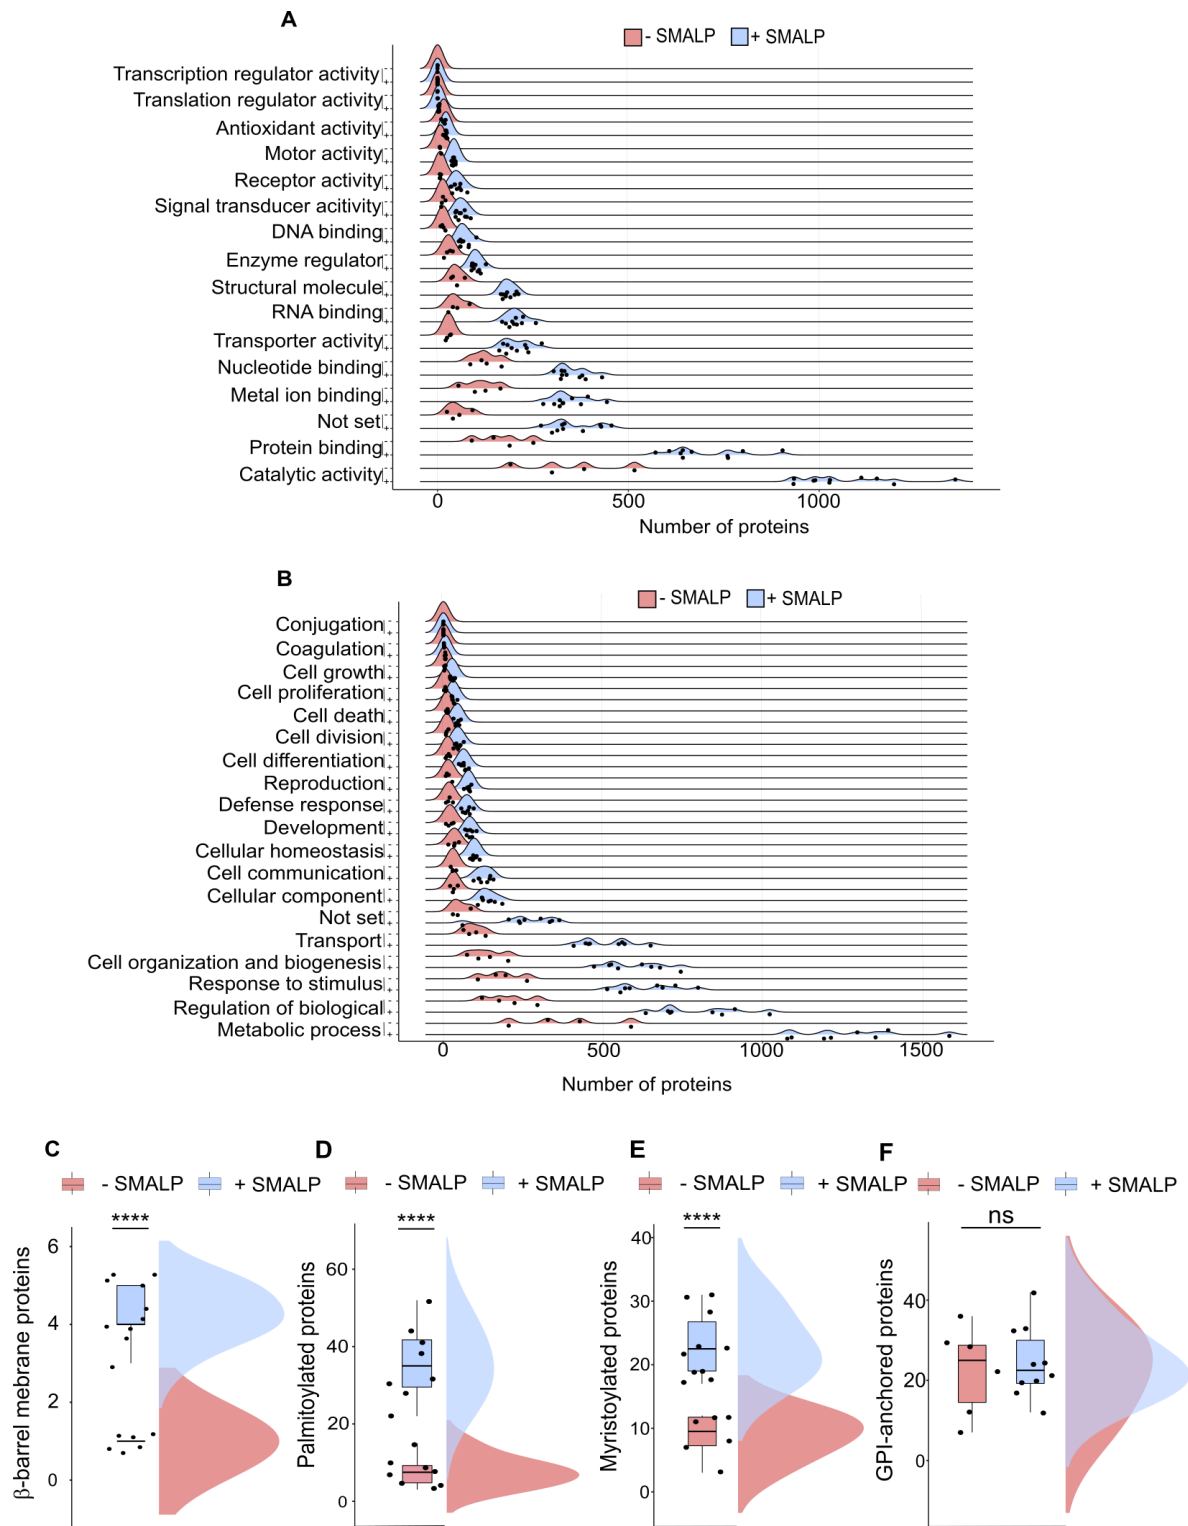



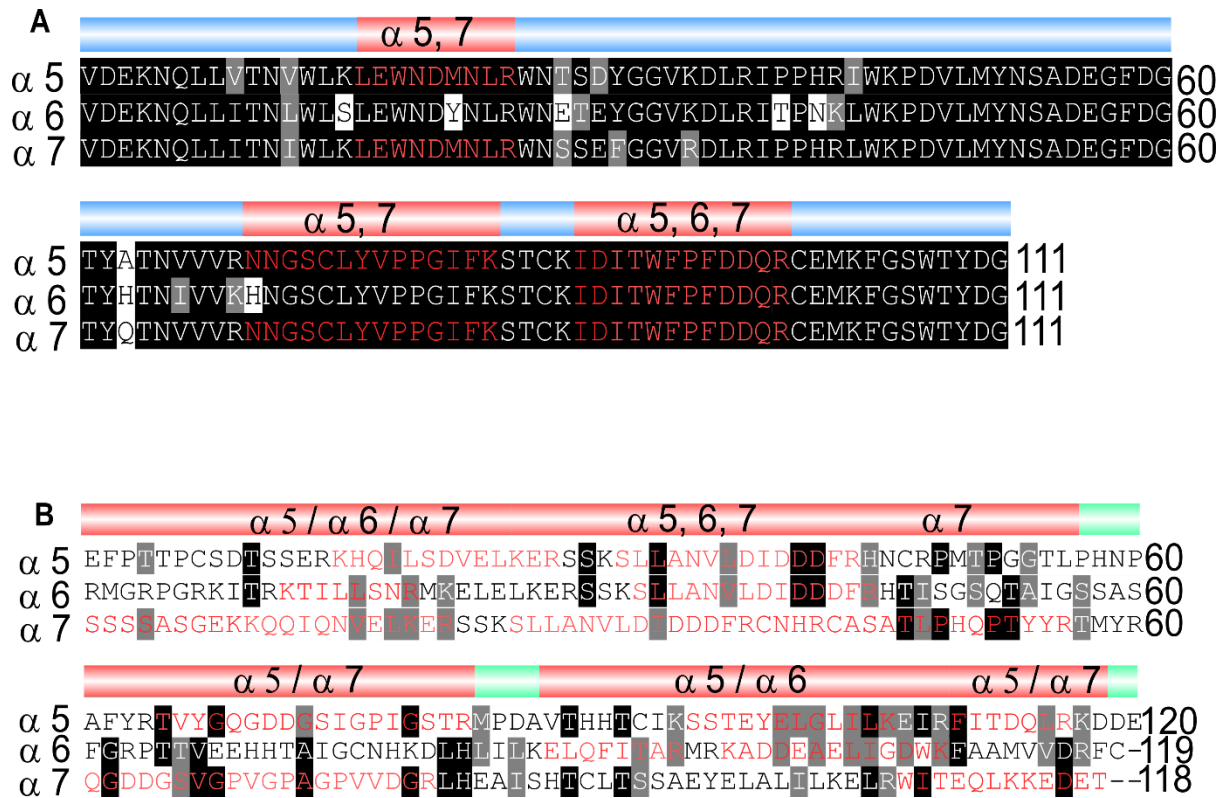

**Appendix Figure S2 Identified peptides in ligand-binding and cytoplasmic domain.**

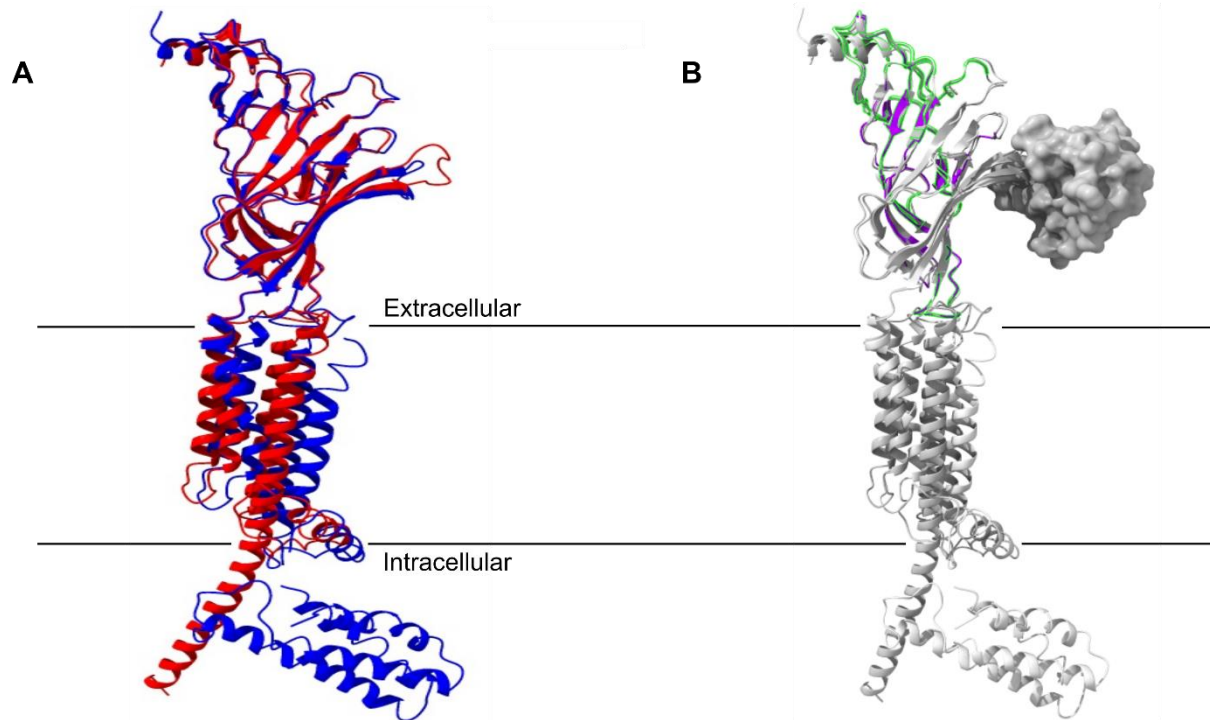

**Appendix Figure S3 Superimposed nAChR  $\alpha$ -subunits structure together with identified peptides.**

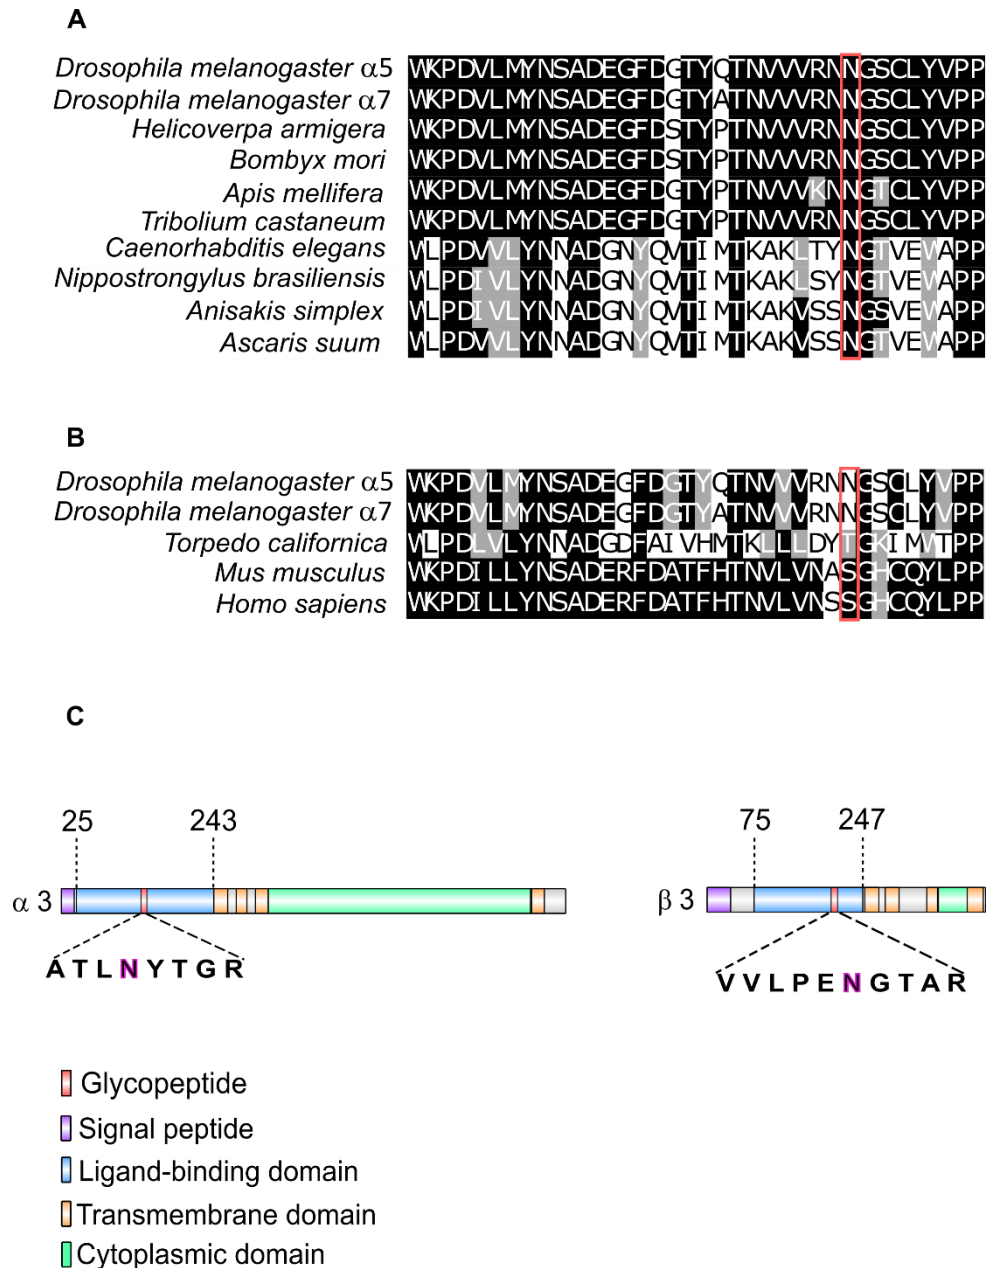

**Appendix Figure S4 Glycosylation sites of nAChR subunits.**
